# Supplementary material for: Surface-chemistry-driven water dissociation on cobalt-based graphene hybrid from molecular dynamics simulations
Source: Royal Society of Chemistry journal article supplement (doi:10.1039/d2cp03184a), 2022-01-01
Supplement: d2cp03184a1.zip [file d2cp03184a1.zip]

```

&FORCE_EVAL
  METHOD Quickstep

&DFT
  LSD
  CHARGE 2
  MULTIPLICITY 3
  BASIS_SET_FILE_NAME /home/gkr/softwares/cp2k-6.1/data/BASIS_MOLOPT
  POTENTIAL_FILE_NAME /home/gkr/softwares/cp2k-6.1/data/GTH_POTENTIALS
  WFN_RESTART_FILE_NAME RESTART.wfn
  &MGRID
    CUTOFF 400
    REL_CUTOFF 40
    NGRIDS 5
  &END MGRID
  &QS
    METHOD GPW
    EPS_DEFAULT 1.0E-12
    EXTRAPOLATION ASPC
    EXTRAPOLATION_ORDER 3
  &END QS
  &SCF
    MAX_SCF 40
    EPS_SCF 1.0E-7
    SCF_GUESS RESTART
  &OUTER_SCF
    EPS_SCF 1.0E-7
    MAX_SCF 10
  &END OUTER_SCF
  &OT
    PRECONDITIONER FULL_ALL
    MINIMIZER DIIS
    N_DIIS 7
  &END OT
  &END SCF

&XC
  &XC_FUNCTIONAL PBE
  &END
  &VDW_POTENTIAL
    POTENTIAL_TYPE PAIR_POTENTIAL
    &PAIR_POTENTIAL
      TYPE DFTD2
      REFERENCE_FUNCTIONAL PBE
    &END PAIR_POTENTIAL
  &END
  &END XC

&PRINT
  &LOWDIN
  &END
  &MULLIKEN
  &END MULLIKEN
  &END
&END DFT

&SUBSYS
  &CELL
    ABC 12.73 12.73 12.73
    PERIODIC XYZ
  &END CELL
&COORD
C 1.269549 9.961778 5.812120
C 1.473338 9.042006 6.872808
C 1.871920 7.594796 6.585205
C 1.361210 7.185406 5.198626

```

|   |           |           |           |
|---|-----------|-----------|-----------|
| C | 1.130568  | 8.155428  | 4.179097  |
| C | 1.162789  | 9.566407  | 4.447065  |
| C | 1.479944  | 6.717242  | 7.737480  |
| C | 1.274587  | 5.785113  | 5.050220  |
| C | 1.263703  | 4.862930  | 6.192904  |
| C | 1.321144  | 5.301508  | 7.551966  |
| C | 1.007277  | 3.497416  | 5.942383  |
| C | 0.818149  | 3.010180  | 4.555513  |
| C | 0.621888  | 3.855013  | 3.501387  |
| C | 0.788368  | 5.305673  | 3.791470  |
| C | 0.544227  | 6.254681  | 2.816025  |
| C | 0.743846  | 7.666261  | 2.896974  |
| C | 1.417575  | 9.502350  | 8.220738  |
| C | 1.224159  | 8.614226  | 9.327566  |
| C | 1.250211  | 7.181982  | 9.019809  |
| C | 0.978739  | 6.281020  | 10.029866 |
| C | 0.794097  | 4.873604  | 9.917070  |
| C | 0.971962  | 4.343790  | 8.611820  |
| C | 0.882080  | 2.601656  | 7.042028  |
| C | 0.945462  | 2.928225  | 8.393734  |
| C | 0.475976  | 3.304384  | 2.142936  |
| C | 0.295634  | 4.322230  | 1.066471  |
| C | 0.707004  | 1.248603  | 6.763621  |
| C | 0.656204  | 1.626663  | 4.364342  |
| C | 0.659192  | 0.818226  | 5.466466  |
| C | 0.791161  | 1.975931  | 9.504293  |
| C | 0.520784  | 2.580906  | 10.715963 |
| C | 0.497719  | 3.936709  | 11.020539 |
| C | 0.565595  | 6.822560  | 11.208206 |
| C | 0.199952  | 8.267625  | 11.558542 |
| C | 0.891194  | 9.204770  | 10.541804 |
| C | 1.181914  | 10.892880 | 8.461343  |
| C | 0.958509  | 11.693470 | 7.318765  |
| C | 0.963175  | 11.303180 | 6.032446  |
| C | 0.887687  | 10.575111 | 3.347942  |
| C | 0.667479  | 9.950805  | 2.142375  |
| C | 0.623690  | 8.597779  | 1.797059  |
| C | 0.702520  | 12.212157 | 5.022688  |
| C | 0.660742  | 12.064067 | 3.658073  |
| C | -0.035015 | 8.123879  | 0.492783  |
| C | -0.082015 | 6.623909  | 0.605339  |
| C | 0.642790  | 1.824313  | 2.016100  |
| C | 0.587123  | 0.896662  | 3.076609  |
| C | 0.724254  | 0.275841  | 7.746412  |
| C | 0.725926  | 0.463384  | 9.165751  |
| C | 0.362006  | 4.514334  | 12.344376 |
| C | 0.218016  | 5.919638  | 12.206404 |
| C | 0.875792  | 10.670980 | 10.817050 |
| C | 1.025667  | 11.644523 | 9.663961  |
| C | 0.152977  | 5.701301  | 1.610647  |
| N | 3.369822  | 7.642518  | 6.455573  |
| C | 4.301928  | 6.675956  | 6.252546  |
| C | 4.238166  | 5.230553  | 6.374810  |
| C | 5.629222  | 7.174584  | 5.958091  |
| C | 5.370318  | 4.487508  | 6.066347  |
| H | 3.380958  | 4.698329  | 6.752048  |
| C | 6.682652  | 6.319451  | 5.746542  |
| H | 5.806345  | 8.241953  | 6.125724  |
| H | 5.290450  | 3.397223  | 6.080202  |
| N | 6.559230  | 4.997980  | 5.711374  |
| C | 8.065024  | 6.827193  | 5.754869  |
| C | 8.470060  | 8.170378  | 5.674085  |
| N | 9.035454  | 5.836528  | 5.649177  |
| O | 7.775693  | 2.198609  | 5.485966  |
| O | 10.127316 | 3.304731  | 5.685525  |
| O | 8.093317  | 4.250621  | 3.602654  |

|    |           |           |           |
|----|-----------|-----------|-----------|
| O  | 8.384720  | 4.222590  | 7.465636  |
| C  | 9.784568  | 8.559252  | 5.547127  |
| H  | 7.679350  | 8.943917  | 5.704760  |
| C  | 10.341199 | 6.178979  | 5.586486  |
| H  | 7.243882  | 2.099176  | 4.590757  |
| H  | 8.169429  | 3.410111  | 3.089423  |
| H  | 7.158968  | 4.550378  | 3.407479  |
| H  | 9.310473  | 4.134003  | 7.872512  |
| H  | 7.703601  | 3.677077  | 7.880852  |
| C  | 10.742873 | 7.531041  | 5.460561  |
| H  | 10.130636 | 9.589336  | 5.638805  |
| H  | 11.058192 | 5.385203  | 5.434835  |
| H  | 11.776680 | 7.851253  | 5.403687  |
| Co | 8.335789  | 4.039353  | 5.528042  |
| O  | 11.161289 | 7.369277  | 8.342151  |
| H  | 11.669061 | 7.313497  | 9.221044  |
| H  | 10.670533 | 12.083358 | 5.611311  |
| O  | 7.894422  | 5.188968  | 10.561764 |
| H  | 8.905601  | 5.376537  | 10.242947 |
| H  | 7.191252  | 5.539992  | 9.848385  |
| O  | 10.378070 | 5.473462  | 10.414322 |
| H  | 10.413999 | 5.072105  | 11.354994 |
| H  | 10.768451 | 4.772043  | 9.834631  |
| O  | 3.761115  | 6.743724  | 3.060337  |
| H  | 3.286393  | 3.579649  | 5.081758  |
| H  | 4.715637  | 6.371613  | 3.111997  |
| O  | 7.684860  | 11.171682 | 10.139173 |
| H  | 7.149967  | 10.288790 | 9.966561  |
| H  | 7.155059  | 11.748556 | 10.833263 |
| O  | 11.564878 | 8.269393  | 11.023520 |
| H  | 11.721375 | 8.561968  | 13.438697 |
| H  | 11.184030 | 9.154273  | 11.144059 |
| O  | 6.521502  | 2.811288  | 8.684524  |
| H  | 6.751661  | 2.859936  | 9.678427  |
| H  | 7.027555  | 2.001064  | 8.365513  |
| O  | 5.224060  | 1.810663  | 0.937106  |
| H  | 4.469965  | 2.443136  | 1.230263  |
| H  | 4.837224  | 1.461957  | 0.120429  |
| O  | 3.751386  | 1.665950  | 8.779532  |
| H  | 3.320547  | 2.475053  | 9.011849  |
| H  | 4.670402  | 2.040598  | 8.795370  |
| O  | 10.742345 | 12.102610 | 6.602701  |
| H  | 10.808879 | 13.134020 | 6.537655  |
| H  | 11.450383 | 10.757312 | 8.057715  |
| O  | 8.368495  | 2.833875  | 11.074529 |
| H  | 7.933954  | 4.193114  | 10.952260 |
| H  | 8.579706  | 2.773898  | 12.052513 |
| O  | 6.732400  | 8.140578  | 10.965064 |
| H  | 7.572875  | 7.672992  | 10.668452 |
| H  | 6.135876  | 7.464667  | 11.349486 |
| O  | 4.093135  | 7.307976  | 9.385420  |
| H  | 3.840367  | 7.898726  | 8.642202  |
| H  | 3.723959  | 7.680046  | 10.267830 |
| O  | 5.955430  | -0.076976 | 8.900637  |
| H  | 5.218619  | -0.747660 | 8.974325  |
| H  | 6.689804  | -0.480989 | 9.383548  |
| O  | 6.174873  | 2.448544  | 3.554916  |
| H  | 5.322773  | 2.806142  | 3.991676  |
| H  | 5.923746  | 1.472740  | 3.344644  |
| O  | 10.429662 | 12.919344 | 4.186617  |
| H  | 9.702019  | 13.115019 | 3.507808  |
| H  | 11.184244 | 12.759292 | 3.575508  |
| O  | 13.313102 | 10.988948 | 12.028027 |
| H  | 11.649931 | 12.583100 | 9.995493  |
| H  | 14.549990 | 11.023780 | 13.092929 |
| O  | 10.556874 | 2.742790  | 3.032484  |

|   |           |           |           |
|---|-----------|-----------|-----------|
| H | 10.583564 | 2.568735  | 4.015808  |
| H | 10.861963 | 3.706641  | 2.992644  |
| O | 10.894357 | 1.845159  | 0.525733  |
| H | 10.880484 | 2.159407  | 1.534814  |
| H | 11.780889 | 1.936362  | 0.148708  |
| O | 10.408618 | 5.367393  | 2.450957  |
| H | 10.578235 | 6.334054  | 2.351926  |
| H | 9.563247  | 5.275772  | 2.909232  |
| O | 9.748643  | 9.909102  | 11.360018 |
| H | 9.323378  | 10.628818 | 10.871622 |
| H | 9.255316  | 9.063772  | 11.131798 |
| O | 3.280254  | 3.658085  | 11.920635 |
| H | 2.869318  | 4.176548  | 11.217119 |
| H | 2.783635  | 2.799755  | 12.112871 |
| O | 6.184647  | 12.493071 | 3.630585  |
| H | 6.180663  | 12.075353 | 2.697499  |
| H | 5.316276  | 12.099878 | 4.033753  |
| O | 2.790324  | 11.113959 | 0.577928  |
| H | 3.047367  | 10.310379 | 1.157214  |
| H | 3.615874  | 8.330354  | 5.731442  |
| O | 3.441408  | 0.803590  | 6.149216  |
| H | 4.491886  | 0.616064  | 6.199672  |
| H | 3.333710  | 1.144721  | 7.076736  |
| O | 11.021903 | 9.988647  | 8.451159  |
| H | 11.248911 | 9.975478  | 9.371673  |
| H | 11.269855 | 8.359140  | 8.026608  |
| O | 3.840945  | 12.573696 | 11.127508 |
| H | 4.174245  | 11.639533 | 11.304671 |
| H | 3.686270  | 12.634397 | 10.172522 |
| O | 3.127137  | 6.220455  | 0.696589  |
| H | 3.194800  | 12.049269 | 1.221633  |
| H | 3.119382  | 6.416097  | 1.708547  |
| O | 10.731977 | 12.808569 | 10.083249 |
| H | 10.287691 | 12.517065 | 10.969054 |
| H | 10.693477 | 14.309848 | 9.927810  |
| O | 6.721949  | 9.291226  | 3.449880  |
| H | 6.003792  | 9.325811  | 4.116423  |
| H | 7.323379  | 9.977745  | 3.854480  |
| O | 6.095748  | 8.119677  | 1.214005  |
| H | 6.395291  | 8.775311  | 1.892658  |
| H | 6.366926  | 8.517323  | 0.349967  |
| O | 5.077157  | 5.895409  | 11.616285 |
| H | 4.659957  | 5.509759  | 10.816972 |
| H | 4.362558  | 5.917354  | 12.315609 |
| O | 9.237813  | -0.134841 | 12.208658 |
| H | 8.903924  | -0.767533 | 12.898209 |
| H | 9.740148  | 0.586521  | 12.686029 |
| O | 3.235726  | 8.198011  | -1.060793 |
| H | 3.074297  | 7.597529  | -0.305626 |
| H | 3.864982  | 8.900648  | -0.901178 |
| O | 10.211029 | 7.869440  | 2.141887  |
| H | 10.524391 | 8.713343  | 2.591400  |
| H | 9.247269  | 7.756755  | 2.414023  |
| O | 2.142318  | 1.413326  | 12.171213 |
| H | 2.735382  | 0.573562  | 12.001248 |
| H | 1.621313  | 1.251949  | 12.989363 |
| O | 3.634637  | 2.822632  | 4.588274  |
| H | 3.483164  | 1.982302  | 5.259884  |
| H | 3.724484  | -0.426440 | 2.885488  |
| O | 3.731587  | 4.635036  | 9.237189  |
| H | 3.712079  | 5.641976  | 9.084254  |
| H | 4.679575  | 4.394982  | 9.217311  |
| O | 10.971042 | 4.405252  | 7.953473  |
| H | 10.957675 | 3.907347  | 7.076775  |
| H | 11.283768 | 5.345366  | 7.708680  |
| O | 3.615082  | 0.116476  | 1.966683  |

|   |           |           |           |
|---|-----------|-----------|-----------|
| H | 3.517008  | 3.111356  | 3.108283  |
| H | 4.463705  | 0.606671  | 1.704445  |
| O | 8.371704  | 11.623663 | 7.429731  |
| H | 9.443100  | 11.681859 | 7.113349  |
| H | 8.074524  | 11.260955 | 8.294374  |
| O | 8.798215  | 7.799725  | 9.717669  |
| H | 9.653134  | 7.493239  | 9.343527  |
| H | 8.391815  | 8.331178  | 8.960356  |
| O | 5.639317  | 10.534877 | 6.365472  |
| H | 5.165495  | 10.173014 | 5.571299  |
| H | 5.734204  | 11.517629 | 6.333741  |
| O | 5.949643  | 0.408812  | 6.419185  |
| H | 5.998469  | 0.311155  | 7.486996  |
| H | 6.675579  | 1.160125  | 6.158554  |
| O | 3.665304  | 9.255603  | 1.914923  |
| H | 3.069948  | 8.513471  | 2.130329  |
| H | 4.444826  | 8.763209  | 1.430660  |
| O | 7.809031  | 3.068496  | 1.313170  |
| H | 6.888449  | 2.714241  | 1.153523  |
| H | 7.842650  | 3.988028  | 0.901956  |
| O | 8.596757  | 1.191412  | 8.169863  |
| H | 9.165064  | 0.887886  | 8.948586  |
| H | 8.365285  | -0.025072 | 7.874452  |
| O | 7.887741  | 7.084375  | 2.867808  |
| H | 7.362474  | 7.019186  | 2.026444  |
| H | 7.543034  | 7.895257  | 3.288964  |
| O | 5.271115  | 10.044797 | 11.875587 |
| H | 5.683497  | 10.403768 | 12.688605 |
| H | 5.975611  | 9.464728  | 11.466338 |
| O | 6.483486  | 9.388496  | 8.431189  |
| H | 6.111034  | 9.722091  | 7.573265  |
| H | 6.097300  | 8.587094  | 8.787846  |
| O | 6.717625  | 0.391884  | 11.606775 |
| H | 7.649560  | 0.700764  | 11.681878 |
| H | 6.269139  | 1.155274  | 11.200661 |
| O | 4.037930  | 9.348274  | 4.706447  |
| H | 2.630055  | 5.425757  | 0.507224  |
| H | 4.004117  | 8.930520  | 3.821067  |
| O | 3.685286  | 3.440523  | 2.160960  |
| H | 3.314625  | 6.236824  | 3.781901  |
| H | 2.769840  | 3.701824  | 1.850530  |
| O | 10.166351 | 4.379304  | 0.122245  |
| H | 10.580473 | 3.492194  | 0.167307  |
| H | 10.451011 | 4.771549  | 0.962494  |
| O | 10.056305 | 10.324907 | 2.928171  |
| H | 9.621812  | 10.843185 | 3.619882  |
| H | 10.745944 | 10.909534 | 2.529200  |
| O | 5.735915  | 3.072640  | 11.221177 |
| H | 4.682654  | 3.204139  | 11.332601 |
| H | 6.105076  | 3.405770  | 12.035594 |
| O | 3.767831  | 11.681595 | 4.161662  |
| H | 3.389434  | 12.135257 | 4.972850  |
| H | 3.812638  | 10.494491 | 4.321245  |
| O | 10.516094 | 2.573750  | 9.733800  |
| H | 9.318019  | 2.757807  | 10.556746 |
| H | 10.813835 | 2.905133  | 8.872311  |
| O | 8.787498  | 0.771741  | 2.262458  |
| H | 8.698268  | 1.740707  | 2.177508  |
| H | 7.883518  | 0.398611  | 2.247959  |
| O | 10.142776 | 1.919135  | 6.211250  |
| H | 9.340177  | 1.431819  | 7.830748  |
| H | 8.692541  | 1.708003  | 5.393766  |
| O | 9.170424  | 7.344587  | 12.568619 |
| H | 9.725947  | 7.710679  | 13.321298 |
| H | 9.851894  | 6.955381  | 11.945004 |
| O | 8.128335  | 11.186378 | 4.726532  |

|   |           |           |           |
|---|-----------|-----------|-----------|
| H | 7.483216  | 11.836322 | 4.333199  |
| H | 7.884314  | 11.264714 | 5.681141  |
| O | 11.588967 | 11.706635 | 1.094512  |
| H | 12.222776 | 11.411664 | 0.369115  |
| H | 11.179075 | 12.531888 | 0.826938  |
| O | 4.047053  | 10.888709 | 8.694850  |
| H | 4.357296  | 10.318754 | 7.952998  |
| H | 3.134556  | 11.082611 | 8.463662  |
| O | 5.732122  | 5.148958  | 2.856640  |
| H | 6.168452  | 5.450101  | 2.057000  |
| H | 5.098990  | 4.444916  | 2.584033  |
| O | 7.276050  | 5.535267  | 0.649090  |
| H | 8.081965  | 6.095843  | 0.363452  |
| H | 6.679528  | 5.557267  | -0.106995 |
| O | 6.098690  | 11.701038 | 1.142033  |
| H | 6.997861  | 11.253293 | 1.120342  |
| H | 6.109159  | 12.338997 | 0.410396  |
| O | 6.388152  | 6.078883  | 8.816294  |
| H | 5.588985  | 6.689877  | 9.041855  |
| H | 7.114520  | 6.706663  | 8.562225  |
| O | 8.412402  | 10.522364 | 0.943596  |
| H | 8.609341  | 9.777198  | 0.350614  |
| H | 9.034610  | 10.341575 | 1.721806  |

&END COORD

&KIND H

BASIS\_SET DZVP-MOLOPT-SR-GTH-q1

POTENTIAL GTH-PBE-q1

&END KIND

&KIND C

BASIS\_SET DZVP-MOLOPT-SR-GTH-q4

POTENTIAL GTH-PBE-q4

&END KIND

&KIND N

BASIS\_SET DZVP-MOLOPT-SR-GTH-q5

POTENTIAL GTH-PBE-q5

&END KIND

&KIND O

BASIS\_SET DZVP-MOLOPT-SR-GTH-q6

POTENTIAL GTH-PBE-q6

&END KIND

&KIND Co

BASIS\_SET DZVP-MOLOPT-SR-GTH-q17

POTENTIAL GTH-PBE-q17

&END KIND

&COLVAR

&COORDINATION

ATOMS\_FROM 199

ATOMS\_TO 84

R\_0 [angstrom] 3.20

NN 10

ND 30

&END COORDINATION

&END COLVAR

&COLVAR

&COORDINATION

ATOMS\_FROM 84

ATOMS\_TO 69

R\_0 [angstrom] 2.10

NN 10

ND 30

&END COORDINATION

&END COLVAR

&END SUBSYS

&END FORCE\_EVAL

&GLOBAL

```

PROJECT co-grap-step3
RUN_TYPE MD
PRINT_LEVEL LOW
&END GLOBAL

&MOTION
&MD
  ENSEMBLE NVT
  STEPS 10000
  TIMESTEP 0.5
  TEMPERATURE 300
  TEMP_TOL 5
  &THERMOSTAT
  &NOSE
    LENGTH 3
    YOSHIDA 3
    TIMECON 30.0
    MTS 2
  &END NOSE
&END
&END MD
&FREE_ENERGY
&METADYN
  DO_HILLS T
  NT_HILLS 5
  WW 5.0e-3
  WELL_TEMPERED
  WTGAMMA 25
  &METAVAR
    SCALE 0.1
    COLVAR 1
    MASS 10
  &WALL
    TYPE QUADRATIC
    POSITION [angstrom] 4.00
    &QUADRATIC
      DIRECTION WALL_MINUS
      K [kcalmol] 5.0
    &END
  &END
  &END METAVAR
  &METAVAR
    SCALE 0.1
    COLVAR 2
    MASS 10
  &WALL
    TYPE QUADRATIC
    POSITION [angstrom] 4.00
    &QUADRATIC
      DIRECTION WALL_MINUS
      K [kcalmol] 5.0
    &END
  &END
  &END METAVAR
  &PRINT
  &COLVAR SILENT
    COMMON_ITERATION_LEVELS      3
  &END COLVAR
  &HILLS SILENT
    COMMON_ITERATION_LEVELS      3
  &END HILLS
#  &FREE_ENERGY_INFO SILENT
#  COMMON_ITERATION_LEVELS      3
#  &END FREE_ENERGY_INFO
  &END PRINT
&END METADYN

```

```
&END
&PRINT
  &TRAJECTORY SILENT
    COMMON_ITERATION_LEVELS      3
  &END TRAJECTORY
  &CELL SILENT
    COMMON_ITERATION_LEVELS      3
  &END CELL
  &VELOCITIES SILENT
    COMMON_ITERATION_LEVELS      3
  &END VELOCITIES
  &RESTART SILENT
    COMMON_ITERATION_LEVELS      3
  &END RESTART
&END PRINT
&END MOTION
```
