# Supplementary material for: Surface-chemistry-driven water dissociation on cobalt-based graphene hybrid from molecular dynamics simulations
Source: Royal Society of Chemistry journal article supplement (doi:10.1039/d2cp03184a), 2022-01-01
Supplement: d2cp03184a1.zip [file d2cp03184a1.zip]

```

&FORCE_EVAL
METHOD Quickstep
&DFT
LSD
CHARGE 2
MULTIPLICITY 3
BASIS_SET_FILE_NAME /home/gkr/softwares/cp2k-6.1/data/BASIS_MOLOPT
POTENTIAL_FILE_NAME /home/gkr/softwares/cp2k-6.1/data/GTH_POTENTIALS
WFN_RESTART_FILE_NAME RESTART.wfn
&MGRID
CUTOFF 400
REL_CUTOFF 40
NGRIDS 5
&END MGRID
&QS
METHOD GPW
EPS_DEFAULT 1.0E-12
EXTRAPOLATION ASPC
EXTRAPOLATION_ORDER 3
&END QS
&SCF
MAX_SCF 40
EPS_SCF 1.0E-7
SCF_GUESS RESTART
&OUTER_SCF
EPS_SCF 1.0E-7
MAX_SCF 10
&END OUTER_SCF
&OT
PRECONDITIONER FULL_ALL
MINIMIZER DIIS
N_DIIS 7
&END OT
&END SCF

&XC
&XC_FUNCTIONAL PBE ! PBE functional + ...
&END
&VDW_POTENTIAL ! ... dispersion interactions
POTENTIAL_TYPE PAIR_POTENTIAL
&PAIR_POTENTIAL
TYPE DFTD2 ! computed with the DFTD2 method
REFERENCE_FUNCTIONAL PBE
&END PAIR_POTENTIAL
&END
&END XC
&END DFT

&SUBSYS
&CELL
ABC 12.73 12.73 12.73
PERIODIC XYZ
&END CELL

&COORD
C 0.880000 9.929999 5.500000
C 1.190000 9.000000 6.580000
C 1.690000 7.530000 6.250000
C 1.120000 7.030000 4.870000
C 0.820000 8.000000 3.820000
C 0.740000 9.430000 4.110000
C 1.330000 6.540000 7.420000
C 0.950000 5.610000 4.650000
C 1.000000 4.660000 5.760000
C 1.140000 5.130000 7.140000
C 0.880000 3.230000 5.500000

```

|   |           |           |           |
|---|-----------|-----------|-----------|
| C | 0.730000  | 2.750000  | 4.130000  |
| C | 0.650000  | 3.710000  | 3.020000  |
| C | 0.720000  | 5.130000  | 3.290000  |
| C | 0.570000  | 6.090000  | 2.190000  |
| C | 0.590000  | 7.530000  | 2.460000  |
| C | 1.070000  | 9.450000  | 7.960000  |
| C | 1.120000  | 8.480000  | 9.060000  |
| C | 1.200000  | 7.040000  | 8.790000  |
| C | 1.130000  | 6.100000  | 9.900000  |
| C | 1.100000  | 4.660000  | 9.630000  |
| C | 1.070000  | 4.190000  | 8.250000  |
| C | 0.900000  | 2.280000  | 6.600000  |
| C | 0.990000  | 2.760000  | 7.990000  |
| C | 0.490000  | 3.240000  | 1.650000  |
| C | 0.400000  | 4.280000  | 0.830000  |
| C | 0.830000  | 0.850000  | 6.320000  |
| C | 0.670000  | 1.320000  | 3.870000  |
| C | 0.740000  | 0.650000  | 5.020000  |
| C | 0.990000  | 1.820000  | 9.100000  |
| C | 1.040000  | 2.480000  | 10.250000 |
| C | 1.070000  | 3.710000  | 10.730000 |
| C | 1.100000  | 6.600000  | 11.280001 |
| C | 1.080000  | 7.920000  | 11.280001 |
| C | 1.050000  | 8.950000  | 10.450000 |
| C | 0.890000  | 10.880001 | 8.230000  |
| C | 0.760000  | 11.540001 | 7.100000  |
| C | 0.700000  | 11.350000 | 5.790000  |
| C | 0.500000  | 10.380000 | 3.020000  |
| C | 0.390000  | 9.720000  | 1.880000  |
| C | 0.390000  | 8.500000  | 1.380000  |
| C | 0.520000  | 12.030000 | 4.670000  |
| C | 0.440000  | 11.619999 | 3.490000  |
| C | 0.270000  | 7.850000  | 0.230000  |
| C | 0.260000  | 6.620000  | 0.000000  |
| C | 0.480000  | 1.910000  | 1.630000  |
| C | 0.560000  | 1.100000  | 2.570000  |
| C | 0.870000  | 0.170000  | 7.460000  |
| C | 0.940000  | 0.570000  | 8.640000  |
| C | 1.090000  | 4.350000  | 11.890000 |
| C | 1.100000  | 5.580000  | 12.120000 |
| C | 0.960000  | 10.270000 | 10.480000 |
| C | 0.890000  | 11.090000 | 9.540000  |
| C | 0.390000  | 5.600000  | 0.830000  |
| N | 3.180000  | 7.650000  | 6.080000  |
| C | 4.280000  | 6.810000  | 6.040000  |
| C | 4.400000  | 5.370000  | 6.060000  |
| C | 5.470000  | 7.500000  | 5.920000  |
| C | 5.680000  | 4.780000  | 5.920000  |
| H | 3.550000  | 4.740000  | 6.190000  |
| C | 6.600000  | 6.850000  | 5.830000  |
| H | 5.480000  | 8.550000  | 5.920000  |
| H | 5.800000  | 3.700000  | 5.900000  |
| N | 6.770000  | 5.580000  | 5.820000  |
| C | 7.870000  | 7.450000  | 5.720000  |
| C | 8.090000  | 8.770000  | 5.690000  |
| N | 8.750000  | 6.520000  | 5.650000  |
| O | 8.230000  | 2.960000  | 5.670000  |
| O | 10.050000 | 4.130000  | 5.850000  |
| O | 9.180000  | 4.460000  | 3.660000  |
| O | 9.180000  | 4.630000  | 7.440000  |
| C | 9.400000  | 9.190001  | 5.620000  |
| H | 7.280000  | 9.450000  | 5.730000  |
| C | 10.039999 | 6.850000  | 5.570000  |
| H | 8.809999  | 2.200000  | 5.770000  |
| H | 10.080000 | 4.490000  | 3.350000  |
| H | 8.750000  | 3.650000  | 3.380000  |

|    |           |           |           |
|----|-----------|-----------|-----------|
| H  | 10.130000 | 4.640000  | 7.620000  |
| H  | 8.809999  | 3.810000  | 7.780000  |
| C  | 10.369999 | 8.230000  | 5.570000  |
| H  | 9.639999  | 10.240001 | 5.620000  |
| H  | 10.809999 | 6.090000  | 5.510000  |
| H  | 11.400000 | 8.530000  | 5.530000  |
| Co | 8.430000  | 4.710000  | 5.530000  |
| O  | 10.747491 | 7.590243  | 8.598937  |
| H  | 10.727179 | 7.698723  | 9.628339  |
| H  | 9.844040  | 12.057049 | 6.669122  |
| O  | 8.355300  | 5.545262  | 10.908658 |
| H  | 8.976822  | 6.278328  | 10.721400 |
| H  | 7.695647  | 5.712935  | 10.201671 |
| O  | 11.192607 | 4.774025  | 11.445318 |
| H  | 10.545305 | 4.746277  | 12.232038 |
| H  | 11.270716 | 3.906816  | 10.943052 |
| O  | 3.966201  | 4.931618  | 3.399235  |
| H  | 3.643015  | 4.313115  | 4.046968  |
| H  | 4.882634  | 4.814923  | 3.248324  |
| O  | 7.986815  | 10.461365 | 10.380076 |
| H  | 7.534626  | 9.782350  | 9.806070  |
| H  | 7.622112  | 10.496266 | 11.287123 |
| O  | 12.450509 | 7.616537  | 11.145765 |
| H  | 12.606269 | 8.113300  | 12.349998 |
| H  | 12.411700 | 6.644406  | 10.931167 |
| O  | 6.897713  | 3.008714  | 8.713646  |
| H  | 6.511094  | 3.381194  | 9.557111  |
| H  | 7.322736  | 2.196355  | 9.002359  |
| O  | 5.777533  | 2.701413  | 1.205623  |
| H  | 5.029792  | 3.318140  | 1.117399  |
| H  | 5.794541  | 2.248563  | 0.343773  |
| O  | 4.097491  | 3.236042  | 8.248528  |
| H  | 3.985621  | 4.041606  | 8.810557  |
| H  | 5.093555  | 3.163145  | 8.206713  |
| O  | 10.843990 | 12.260831 | 6.575796  |
| H  | 10.826283 | 12.325910 | 5.583535  |
| H  | 11.122058 | 11.121305 | 7.830110  |
| O  | 8.586997  | 2.854648  | 10.921709 |
| H  | 8.290289  | 3.805989  | 10.694123 |
| H  | 8.527999  | 2.825292  | 11.903119 |
| O  | 6.768320  | 7.895758  | 11.054452 |
| H  | 7.478734  | 7.929360  | 11.731563 |
| H  | 7.287490  | 7.824143  | 10.231608 |
| O  | 3.874013  | 8.684276  | 8.743598  |
| H  | 3.634863  | 8.290987  | 7.873202  |
| H  | 3.557733  | 9.618033  | 8.694829  |
| O  | 6.011199  | -0.343796 | 9.399488  |
| H  | 5.201989  | -0.959132 | 9.292953  |
| H  | 6.668013  | -1.036566 | 9.690725  |
| O  | 6.897567  | 2.493233  | 3.682509  |
| H  | 7.234938  | 2.467649  | 4.559132  |
| H  | 6.137557  | 1.882025  | 3.438478  |
| O  | 10.253689 | 12.982252 | 4.079344  |
| H  | 9.435786  | 12.515319 | 4.338540  |
| H  | 10.543897 | 12.493642 | 3.284178  |
| O  | 12.301828 | 11.974570 | 12.562934 |
| H  | 11.980198 | 12.125349 | 11.597016 |
| H  | 12.464193 | 11.017178 | 12.589131 |
| O  | 10.597003 | 2.405199  | 2.645597  |
| H  | 10.334195 | 1.610062  | 3.179177  |
| H  | 11.332718 | 2.750455  | 3.107687  |
| O  | 10.773828 | 1.603800  | -0.086868 |
| H  | 10.806158 | 1.956165  | 0.811919  |
| H  | 11.726752 | 1.621472  | -0.341964 |
| O  | 10.654727 | 6.924871  | 2.718303  |
| H  | 10.620008 | 7.907376  | 2.706496  |

|   |           |           |           |
|---|-----------|-----------|-----------|
| H | 9.709547  | 6.850519  | 3.073702  |
| O | 10.732882 | 10.077434 | 11.246646 |
| H | 9.762946  | 9.915641  | 11.050227 |
| H | 11.176422 | 9.246428  | 11.423914 |
| O | 2.961173  | 2.406630  | 12.598989 |
| H | 3.179674  | 3.346006  | 12.991539 |
| H | 3.172288  | 2.058818  | 13.519256 |
| O | 5.776417  | 12.536417 | 3.375795  |
| H | 5.766282  | 12.348249 | 2.356647  |
| H | 4.890325  | 12.539184 | 3.846558  |
| O | 3.879960  | 10.264947 | 2.087164  |
| H | 3.591460  | 9.491004  | 1.531560  |
| H | 3.529678  | 8.961095  | 5.081512  |
| O | 3.873634  | 0.884195  | 7.094145  |
| H | 4.835124  | 0.912930  | 7.146903  |
| H | 3.576238  | 1.717304  | 7.537430  |
| O | 10.755840 | 10.360808 | 8.342281  |
| H | 10.937420 | 10.529557 | 9.260922  |
| H | 11.157245 | 8.431048  | 8.285234  |
| O | 2.824619  | 11.574911 | 11.494320 |
| H | 3.501506  | 10.889529 | 11.570793 |
| H | 3.343955  | 12.344353 | 11.081221 |
| O | 2.407824  | 12.219968 | 1.190987  |
| H | 3.107658  | 10.959175 | 1.974846  |
| H | 2.648231  | 11.958112 | 0.218929  |
| O | 11.422143 | 12.661217 | 10.021826 |
| H | 10.499134 | 12.330298 | 10.131231 |
| H | 11.225121 | 13.670368 | 9.949944  |
| O | 6.681015  | 9.522381  | 3.124437  |
| H | 5.731445  | 9.743104  | 3.103454  |
| H | 7.058577  | 10.294245 | 3.619314  |
| O | 5.787589  | 7.928681  | 0.720673  |
| H | 6.367018  | 8.645560  | 0.973476  |
| H | 4.880451  | 8.300752  | 0.564533  |
| O | 4.159175  | 6.454400  | 11.682593 |
| H | 4.950068  | 6.985016  | 11.855124 |
| H | 3.966593  | 6.460377  | 10.715879 |
| O | 8.917443  | 0.180192  | 11.603719 |
| H | 8.791991  | -0.644221 | 12.154855 |
| H | 9.638507  | 0.792144  | 12.021736 |
| O | 3.058639  | 8.148529  | 0.857600  |
| H | 3.313220  | 7.527406  | 0.122322  |
| H | 3.146553  | 7.718191  | 1.713057  |
| O | 8.587560  | 7.895592  | 0.399596  |
| H | 8.955909  | 8.749016  | 0.815666  |
| H | 8.209251  | 7.586437  | 1.246606  |
| O | 3.731437  | 1.315200  | 10.187983 |
| H | 3.995164  | 1.789544  | 9.423810  |
| H | 3.621844  | 1.979105  | 10.957786 |
| O | 3.910918  | 2.668686  | 4.586197  |
| H | 3.647894  | 2.239578  | 5.400266  |
| H | 3.579634  | 2.154469  | 3.850236  |
| O | 4.085087  | 5.725792  | 9.154791  |
| H | 3.442487  | 6.054500  | 8.523922  |
| H | 5.013692  | 5.902848  | 8.789852  |
| O | 11.215947 | 5.087007  | 8.452833  |
| H | 10.982048 | 5.053419  | 9.392047  |
| H | 11.294647 | 6.065653  | 8.397974  |
| O | 3.523630  | 1.566204  | 2.281225  |
| H | 2.971371  | 0.708473  | 2.253751  |
| H | 4.404666  | 1.143188  | 2.046441  |
| O | 8.509942  | 11.540919 | 7.450838  |
| H | 9.000538  | 10.750257 | 7.899888  |
| H | 8.434828  | 12.200852 | 8.178293  |
| O | 8.079630  | 7.570414  | 8.605250  |
| H | 9.066317  | 7.785111  | 8.451255  |

|   |           |           |           |
|---|-----------|-----------|-----------|
| H | 7.532815  | 8.383166  | 8.230737  |
| O | 5.298769  | 10.693052 | 6.320562  |
| H | 4.703105  | 10.419343 | 5.516718  |
| H | 5.762084  | 11.504164 | 6.010886  |
| O | 6.463996  | 0.750316  | 6.903456  |
| H | 6.347070  | 0.462387  | 7.886501  |
| H | 6.589850  | 1.686881  | 7.100865  |
| O | 4.480165  | 7.451674  | 3.091281  |
| H | 4.189011  | 6.561333  | 3.307556  |
| H | 5.179364  | 7.378059  | 2.332794  |
| O | 8.242700  | 2.989244  | 0.800732  |
| H | 7.381610  | 3.434374  | 1.080958  |
| H | 9.005274  | 3.542701  | 1.162927  |
| O | 8.408635  | 0.865291  | 9.055389  |
| H | 8.596127  | 0.674694  | 10.013165 |
| H | 9.177007  | 1.360260  | 8.738644  |
| O | 7.883119  | 7.223924  | 2.856329  |
| H | 7.368552  | 6.392552  | 3.056608  |
| H | 7.265028  | 7.991000  | 3.187734  |
| O | 4.612465  | 9.470360  | 11.387348 |
| H | 4.305831  | 9.128363  | 10.530944 |
| H | 5.614794  | 9.105819  | 11.314048 |
| O | 6.319296  | 9.305797  | 8.286256  |
| H | 6.203575  | 10.025149 | 7.509885  |
| H | 5.389381  | 8.992898  | 8.501364  |
| O | 6.342672  | 1.096142  | 11.730209 |
| H | 7.347004  | 0.938982  | 11.922975 |
| H | 6.150001  | 0.607592  | 10.890680 |
| O | 3.748690  | 9.801225  | 4.613476  |
| H | 1.460064  | 12.114308 | 1.313442  |
| H | 3.635557  | 9.711456  | 3.668727  |
| O | 3.638757  | 4.681940  | 0.929405  |
| H | 3.605701  | 4.949786  | 1.895001  |
| H | 3.725712  | 5.477351  | 0.376164  |
| O | 9.605581  | 5.071249  | 0.883031  |
| H | 10.068959 | 5.866776  | 1.278682  |
| H | 8.802278  | 5.426249  | 0.443699  |
| O | 9.693662  | 9.608212  | 2.343031  |
| H | 9.183641  | 9.698049  | 3.155866  |
| H | 10.227795 | 10.527294 | 2.186502  |
| O | 5.552782  | 3.928035  | 10.877771 |
| H | 4.765018  | 4.479108  | 11.010564 |
| H | 5.295320  | 3.043532  | 11.294724 |
| O | 3.532145  | 12.559317 | 4.611544  |
| H | 3.355182  | 12.883183 | 5.534250  |
| H | 3.293218  | 11.546611 | 4.804966  |
| O | 10.910221 | 2.506111  | 9.871119  |
| H | 10.001445 | 2.736092  | 10.285110 |
| H | 10.724571 | 2.572903  | 8.928989  |
| O | 8.442785  | 0.556402  | 1.743830  |
| H | 8.437132  | 1.405442  | 1.222127  |
| H | 7.839385  | 0.691211  | 2.480533  |
| O | 10.131748 | 2.039693  | 7.126503  |
| H | 10.714747 | 1.245540  | 6.985439  |
| H | 10.443686 | 2.701953  | 6.516008  |
| O | 10.426711 | 7.397312  | 11.368784 |
| H | 9.863430  | 7.402674  | 12.195440 |
| H | 10.848370 | 6.516660  | 11.291264 |
| O | 7.970789  | 11.893921 | 4.928883  |
| H | 7.245504  | 12.322224 | 4.436040  |
| H | 7.890656  | 12.163790 | 5.913207  |
| O | 10.604530 | 11.893748 | 1.758544  |
| H | 9.764090  | 12.499016 | 1.548346  |
| H | 11.204437 | 12.077744 | 0.952184  |
| O | 3.841299  | 11.295623 | 8.386219  |
| H | 4.321449  | 11.061031 | 7.486182  |

|   |          |           |           |
|---|----------|-----------|-----------|
| H | 3.481776 | 12.217567 | 8.176330  |
| O | 6.431921 | 4.962752  | 2.998924  |
| H | 6.469556 | 5.068657  | 1.996485  |
| H | 6.773592 | 3.883811  | 2.971516  |
| O | 6.884172 | 5.372813  | 0.484062  |
| H | 6.573124 | 5.138368  | -0.408561 |
| H | 6.653374 | 6.305342  | 0.694114  |
| O | 5.528439 | 11.805328 | 0.691237  |
| H | 4.721204 | 11.353884 | 1.039205  |
| H | 5.348190 | 12.477672 | 0.001024  |
| O | 6.533318 | 5.636213  | 8.695601  |
| H | 7.221125 | 6.362147  | 8.491354  |
| H | 6.785088 | 4.822701  | 8.264505  |
| O | 7.926146 | 10.826122 | 0.202004  |
| H | 8.627344 | 10.492409 | 0.845892  |
| H | 7.132014 | 11.275638 | 0.628410  |

&END COORD

&KIND H  
BASIS\_SET DZVP-MOLOPT-SR-GTH-q1  
POTENTIAL GTH-PBE-q1  
&END KIND  
&KIND C  
BASIS\_SET DZVP-MOLOPT-SR-GTH-q4  
POTENTIAL GTH-PBE-q4  
&END KIND  
&KIND N  
BASIS\_SET DZVP-MOLOPT-SR-GTH-q5  
POTENTIAL GTH-PBE-q5  
&END KIND  
&KIND O  
BASIS\_SET DZVP-MOLOPT-SR-GTH-q6  
POTENTIAL GTH-PBE-q6  
&END KIND  
&KIND Co  
BASIS\_SET DZVP-MOLOPT-SR-GTH-q17  
POTENTIAL GTH-PBE-q17  
&END KIND  
&END SUBSYS  
&END FORCE\_EVAL

&GLOBAL  
PROJECT co-graphene-nvt  
RUN\_TYPE MD  
PRINT\_LEVEL LOW  
&END GLOBAL

&MOTION  
&MD  
ENSEMBLE NVT  
STEPS 10000  
TIMESTEP 0.5  
TEMPERATURE 300  
TEMP\_TOL 10  
&THERMOSTAT  
&NOSE  
LENGTH 3  
YOSHIDA 3  
TIMECON 30.0  
MTS 2  
&END NOSE  
&END  
&END MD

&PRINT  
&TRAJECTORY SILENT

|                         |   |
|-------------------------|---|
| COMMON_ITERATION_LEVELS | 3 |
| &END TRAJECTORY         |   |
| &CELL SILENT            |   |
| COMMON_ITERATION_LEVELS | 3 |
| &END CELL               |   |
| &VELOCITIES SILENT      |   |
| COMMON_ITERATION_LEVELS | 3 |
| &END VELOCITIES         |   |
| &RESTART SILENT         |   |
| COMMON_ITERATION_LEVELS | 3 |
| &END RESTART            |   |
| &END PRINT              |   |
| &END MOTION             |   |
