# Supplementary material for: Surface-chemistry-driven water dissociation on cobalt-based graphene hybrid from molecular dynamics simulations
Source: Royal Society of Chemistry journal article supplement (doi:10.1039/d2cp03184a), 2022-01-01
Supplement: d2cp03184a1.zip [file d2cp03184a1.zip]

```

&FORCE__EVAL
METHOD Quickstep

&DFT
LSD
CHARGE 2
MULTIPLICITY 3
BASIS__SET__FILE__NAME /home/softwares/cp2k-6.1/data/BASIS__MOLOPT
POTENTIAL__FILE__NAME /home/softwares/cp2k-6.1/data/GTH__POTENTIALS
WFN__RESTART__FILE__NAME RESTART.wfn
&MGRID
CUTOFF 400
REL__CUTOFF 40
NGRIDS 5
&END MGRID
&QS
METHOD GPW
EPS__DEFAULT 1.0E-12
EXTRAPOLATION ASPC
EXTRAPOLATION__ORDER 3
&END QS
&SCF
MAX__SCF 40
EPS__SCF 1.0E-7
SCF__GUESS RESTART
&OUTER__SCF
EPS__SCF 1.0E-7
MAX__SCF 10
&END OUTER__SCF
&OT
PRECONDITIONER FULL__ALL
MINIMIZER DIIS
N__DIIS 7
&END OT
&END SCF

&XC
&XC__FUNCTIONAL PBE
&END
&VDW__POTENTIAL
POTENTIAL__TYPE PAIR__POTENTIAL
&PAIR__POTENTIAL
TYPE DFTD2
REFERENCE__FUNCTIONAL PBE
&END PAIR__POTENTIAL
&END
&END XC

&PRINT
&LOWDIN
&END
&MULLIKEN
&END MULLIKEN
&END
&END DFT

&SUBSYS
&CELL
ABC 12.73 12.73 12.73
PERIODIC XYZ

```

&END CELL

&COORD

|   |          |           |           |
|---|----------|-----------|-----------|
| C | 1.160546 | 9.353213  | 5.371613  |
| C | 1.324170 | 8.505898  | 6.530995  |
| C | 1.953744 | 7.112737  | 6.254045  |
| C | 1.372554 | 6.651041  | 4.926012  |
| C | 1.187254 | 7.592546  | 3.850465  |
| C | 1.216491 | 9.021275  | 4.006654  |
| C | 1.736850 | 6.209560  | 7.461468  |
| C | 1.405978 | 5.226120  | 4.768989  |
| C | 1.352027 | 4.338665  | 5.921669  |
| C | 1.642265 | 4.707699  | 7.200697  |
| C | 1.076776 | 2.956856  | 5.654847  |
| C | 0.897321 | 2.457032  | 4.305866  |
| C | 0.957998 | 3.341896  | 3.189810  |
| C | 1.032896 | 4.727115  | 3.521995  |
| C | 0.677948 | 5.671436  | 2.496174  |
| C | 0.915703 | 7.075999  | 2.608086  |
| C | 1.190589 | 8.964607  | 7.862969  |
| C | 1.313087 | 8.101510  | 9.009796  |
| C | 1.466506 | 6.709324  | 8.709363  |
| C | 1.048528 | 5.725872  | 9.682728  |
| C | 1.141167 | 4.345119  | 9.538034  |
| C | 1.314006 | 3.778322  | 8.289798  |
| C | 1.059715 | 1.982188  | 6.679267  |
| C | 1.113144 | 2.322878  | 8.063836  |
| C | 0.780283 | 2.730700  | 1.875221  |
| C | 0.556601 | 3.756356  | 0.778030  |
| C | 0.914980 | 0.644473  | 6.373044  |
| C | 0.959360 | 1.133267  | 4.062901  |
| C | 0.892901 | 0.283998  | 5.089631  |
| C | 1.152949 | 1.352255  | 9.125617  |
| C | 0.937595 | 1.944688  | 10.510672 |
| C | 0.837230 | 3.436960  | 10.720276 |
| C | 0.660810 | 6.292472  | 10.823940 |
| C | 0.422698 | 7.716880  | 11.245183 |
| C | 1.075748 | 8.754872  | 10.247314 |
| C | 0.990399 | 10.325196 | 8.091377  |
| C | 0.893335 | 11.132207 | 6.968788  |
| C | 0.782453 | 10.636828 | 5.678818  |
| C | 1.093400 | 10.004527 | 2.932047  |
| C | 0.964094 | 9.357644  | 1.705360  |
| C | 0.770416 | 8.022366  | 1.513656  |
| C | 0.747519 | 11.614961 | 4.647823  |
| C | 0.891620 | 11.395251 | 3.309911  |
| C | 0.123177 | 7.576733  | 0.195900  |
| C | 0.120133 | 6.114604  | 0.243920  |
| C | 0.730751 | 1.201194  | 1.854510  |
| C | 0.879846 | 0.343849  | 2.842999  |
| C | 0.983933 | -0.271866 | 7.425473  |
| C | 1.106640 | -0.091360 | 8.824082  |
| C | 0.571743 | 4.010707  | 11.980573 |
| C | 0.291740 | 5.429399  | 11.831637 |
| C | 0.967821 | 10.190632 | 10.272889 |
| C | 1.105572 | 11.101778 | 9.260490  |
| C | 0.369736 | 5.138941  | 1.272208  |
| N | 3.414337 | 7.331741  | 6.153456  |
| C | 4.453390 | 6.440907  | 6.110343  |

|    |           |           |           |
|----|-----------|-----------|-----------|
| C  | 4.460197  | 5.029667  | 6.154690  |
| C  | 5.703723  | 7.115432  | 5.962767  |
| C  | 5.665274  | 4.416094  | 5.966585  |
| H  | 3.569495  | 4.440015  | 6.093763  |
| C  | 6.900640  | 6.432732  | 5.837856  |
| H  | 5.825530  | 8.158790  | 6.117792  |
| H  | 5.710501  | 3.352141  | 5.764939  |
| N  | 6.843682  | 5.039752  | 5.833621  |
| C  | 8.231010  | 7.027142  | 5.702621  |
| C  | 8.495999  | 8.443100  | 5.776100  |
| N  | 9.266346  | 6.163847  | 5.537775  |
| O  | 8.073179  | 2.553463  | 5.888252  |
| O  | 10.381428 | 3.650651  | 5.659831  |
| O  | 8.738786  | 4.325737  | 3.831473  |
| O  | 8.968756  | 4.618174  | 7.672766  |
| C  | 9.802403  | 8.818292  | 5.470288  |
| H  | 7.694004  | 9.172077  | 5.993472  |
| C  | 10.534965 | 6.601218  | 5.262304  |
| H  | 8.897843  | 2.097636  | 5.779857  |
| H  | 9.320695  | 3.480817  | 3.616221  |
| H  | 7.848097  | 4.406188  | 3.316852  |
| H  | 9.972022  | 4.873806  | 7.790112  |
| H  | 8.698655  | 3.865714  | 8.239867  |
| C  | 10.825416 | 7.947205  | 5.183948  |
| H  | 10.016137 | 9.870893  | 5.442700  |
| H  | 11.350431 | 5.875359  | 5.166013  |
| H  | 11.793391 | 8.395885  | 5.039369  |
| Co | 8.755121  | 4.345615  | 5.795444  |
| O  | 11.158037 | 8.066751  | 8.225367  |
| H  | 11.287082 | 8.041759  | 9.190322  |
| H  | 9.936831  | 12.642785 | 6.842613  |
| O  | 7.864428  | 5.444974  | 11.088559 |
| H  | 8.634106  | 6.039676  | 11.339479 |
| H  | 7.550693  | 5.591567  | 10.130933 |
| O  | 10.912579 | 4.603919  | 10.140809 |
| H  | 10.956012 | 5.295788  | 10.796071 |
| H  | 11.179359 | 3.777426  | 10.560032 |
| O  | 3.885058  | 5.606363  | 2.864357  |
| H  | 3.638554  | 3.815300  | 3.666487  |
| H  | 4.841831  | 5.314307  | 2.918831  |
| O  | 7.484462  | 11.091526 | 10.169281 |
| H  | 7.105693  | 10.409930 | 9.510356  |
| H  | 6.976018  | 10.970469 | 10.999342 |
| O  | 11.692416 | 8.011202  | 10.835320 |
| H  | 12.457196 | 7.834192  | 11.476184 |
| H  | 11.505816 | 8.872686  | 11.356940 |
| O  | 6.620025  | 3.161240  | 8.500541  |
| H  | 6.631415  | 3.241103  | 9.501532  |
| H  | 7.142297  | 2.342354  | 8.263769  |
| O  | 5.759493  | 2.360853  | 0.870568  |
| H  | 4.959504  | 2.906852  | 0.819635  |
| H  | 5.971130  | 1.843179  | 0.051499  |
| O  | 4.045310  | 2.719281  | 8.484456  |
| H  | 3.682185  | 3.588178  | 8.500763  |
| H  | 4.636919  | 2.914313  | 8.257790  |
| O  | 10.887803 | 12.637846 | 6.673587  |
| H  | 10.966234 | 12.813077 | 5.691122  |
| H  | 11.086308 | 11.088713 | 7.598607  |

|   |           |           |           |
|---|-----------|-----------|-----------|
| O | 8.675343  | 2.784101  | 10.784655 |
| H | 8.475033  | 3.740087  | 10.610928 |
| H | 8.393826  | 2.527759  | 11.682376 |
| O | 6.948421  | 8.188755  | 11.376935 |
| H | 7.927340  | 8.361741  | 11.283300 |
| H | 6.817232  | 7.255620  | 11.182018 |
| O | 4.076015  | 8.497825  | 8.856579  |
| H | 3.795948  | 8.075426  | 8.025059  |
| H | 3.590149  | 9.312828  | 8.878506  |
| O | 6.079832  | 0.367271  | 9.189362  |
| H | 5.195911  | -0.090942 | 9.407221  |
| H | 6.759536  | -0.377158 | 9.498242  |
| O | 7.049069  | 2.168485  | 3.612442  |
| H | 7.253738  | 2.383083  | 4.576986  |
| H | 6.535551  | 1.303159  | 3.615792  |
| O | 10.607390 | 12.989443 | 4.072124  |
| H | 9.896998  | 12.244151 | 4.097761  |
| H | 11.359279 | 12.694746 | 3.499201  |
| O | 11.623149 | 10.176405 | 12.418152 |
| H | 11.558956 | 10.858657 | 11.678243 |
| H | 11.146527 | 10.585136 | 13.176435 |
| O | 10.367250 | 2.640924  | 2.974187  |
| H | 10.314359 | 1.646682  | 3.121542  |
| H | 11.217655 | 2.943347  | 3.427317  |
| O | 11.055379 | 1.488972  | 0.129808  |
| H | 10.912644 | 2.290894  | 0.657335  |
| H | 11.446211 | 1.803386  | -0.740479 |
| O | 10.519710 | 5.948532  | 2.724681  |
| H | 10.166412 | 6.629431  | 2.140183  |
| H | 9.719433  | 5.525219  | 3.176325  |
| O | 9.438232  | 9.223940  | 10.756214 |
| H | 8.989966  | 10.099998 | 10.679408 |
| H | 9.360102  | 8.809218  | 9.873500  |
| O | 2.738373  | 4.087837  | 11.603479 |
| H | 2.639790  | 4.588897  | 12.505616 |
| H | 3.241724  | 3.196223  | 11.883936 |
| O | 6.091373  | 12.344028 | 3.422266  |
| H | 6.120562  | 12.221335 | 2.411611  |
| H | 5.160213  | 12.333520 | 3.788180  |
| O | 3.330730  | 10.938871 | 1.307405  |
| H | 3.014854  | 10.226228 | 1.886767  |
| H | 3.562276  | 8.631448  | 4.903672  |
| O | 3.660981  | 1.212080  | 6.143740  |
| H | 4.661441  | 1.064213  | 6.280982  |
| H | 3.474208  | 1.759827  | 6.949608  |
| O | 10.654783 | 10.549089 | 8.315033  |
| H | 11.042108 | 10.935593 | 9.163077  |
| H | 10.991783 | 9.019555  | 8.081367  |
| O | 4.045373  | 11.535599 | 9.718850  |
| H | 4.517540  | 10.697775 | 10.024056 |
| H | 3.686355  | 11.442037 | 8.782594  |
| O | 2.148004  | 6.052577  | 0.433041  |
| H | 3.574751  | 11.655655 | 1.892928  |
| H | 2.155827  | 6.646049  | 1.202871  |
| O | 11.416661 | 11.905636 | 10.420580 |
| H | 10.623981 | 12.432289 | 10.682698 |
| H | 12.141491 | 12.565319 | 10.408415 |
| O | 6.886220  | 9.647428  | 3.462652  |

|   |           |           |           |
|---|-----------|-----------|-----------|
| H | 6.304522  | 10.448583 | 3.503963  |
| H | 7.652163  | 10.010725 | 3.994223  |
| O | 6.104050  | 8.456458  | 1.050107  |
| H | 6.691931  | 9.007247  | 1.610884  |
| H | 6.379474  | 8.791621  | 0.176158  |
| O | 4.114653  | 5.760557  | 12.032160 |
| H | 5.095079  | 5.649632  | 12.449119 |
| H | 4.123200  | 5.558454  | 10.934808 |
| O | 9.220374  | -0.005272 | 11.595005 |
| H | 9.223977  | -0.834228 | 12.168912 |
| H | 9.870963  | 0.606859  | 12.019506 |
| O | 3.223466  | 7.985863  | -0.291806 |
| H | 3.777668  | 6.740114  | -0.447372 |
| H | 3.052290  | 8.159868  | 0.661635  |
| O | 9.155200  | 8.351476  | 1.503193  |
| H | 9.593985  | 8.937857  | 2.195462  |
| H | 8.411582  | 7.906279  | 1.990477  |
| O | 3.557735  | 2.189092  | 11.219187 |
| H | 3.685171  | 2.081931  | 10.262985 |
| H | 3.490600  | 1.280421  | 11.562888 |
| O | 3.877678  | 2.844771  | 3.737858  |
| H | 3.652915  | 2.594541  | 4.679443  |
| H | 3.700231  | 1.799998  | 2.605635  |
| O | 3.989321  | 5.457345  | 9.506777  |
| H | 3.610168  | 6.351493  | 9.331899  |
| H | 4.989271  | 5.543000  | 9.234874  |
| O | 11.491329 | 5.423397  | 7.754004  |
| H | 11.606127 | 5.168013  | 8.702518  |
| H | 11.428649 | 6.431391  | 7.820906  |
| O | 3.619576  | 0.985084  | 1.988971  |
| H | 4.290467  | 3.097480  | 0.407184  |
| H | 4.441636  | 0.967960  | 1.464700  |
| O | 8.312275  | 11.533975 | 7.249351  |
| H | 9.090043  | 11.097597 | 7.688346  |
| H | 8.251953  | 12.341109 | 7.797854  |
| O | 8.427850  | 7.761400  | 8.568455  |
| H | 9.292871  | 7.658953  | 8.122052  |
| H | 7.782474  | 8.357798  | 8.163353  |
| O | 5.947753  | 10.636112 | 6.116030  |
| H | 5.358805  | 10.318355 | 5.380232  |
| H | 6.141495  | 11.606379 | 5.992774  |
| O | 6.152878  | 0.665482  | 6.573643  |
| H | 6.197426  | 0.530396  | 7.570641  |
| H | 6.882742  | 1.276587  | 6.348103  |
| O | 3.838970  | 8.271626  | 2.529398  |
| H | 3.990984  | 7.301448  | 2.700706  |
| H | 4.646069  | 8.565380  | 1.933090  |
| O | 8.178555  | 2.753232  | 0.636004  |
| H | 7.233819  | 2.926458  | 0.904525  |
| H | 8.923656  | 3.414768  | 0.841217  |
| O | 8.632726  | 0.987173  | 8.460997  |
| H | 8.615671  | 0.771935  | 9.412340  |
| H | 9.458091  | 1.594625  | 8.206164  |
| O | 7.520682  | 7.070034  | 2.954214  |
| H | 7.163279  | 6.160270  | 2.828020  |
| H | 6.775942  | 7.571717  | 3.354781  |
| O | 4.955399  | 9.841805  | 11.501919 |
| H | 4.449772  | 8.924321  | 11.568832 |

|   |           |           |           |
|---|-----------|-----------|-----------|
| H | 5.725065  | 9.370746  | 11.163461 |
| O | 6.512436  | 9.567743  | 8.361327  |
| H | 6.484747  | 10.162319 | 7.551178  |
| H | 5.597298  | 9.229900  | 8.517076  |
| O | 6.713083  | 0.748469  | 11.771338 |
| H | 7.729300  | 0.525691  | 11.681499 |
| H | 6.371106  | 0.863792  | 10.845495 |
| O | 3.946182  | 9.612786  | 4.736053  |
| H | 2.108950  | 5.314826  | 1.093637  |
| H | 3.905692  | 9.179841  | 3.847304  |
| O | 3.673104  | 3.727026  | 0.915666  |
| H | 3.542318  | 5.140658  | 2.112880  |
| H | 3.482088  | 4.134719  | 0.065237  |
| O | 10.307084 | 4.193658  | 0.653174  |
| H | 10.557287 | 4.738637  | 1.473930  |
| H | 10.063437 | 4.903326  | 0.052733  |
| O | 10.790808 | 9.885345  | 2.976851  |
| H | 11.667205 | 9.418871  | 2.919880  |
| H | 10.945815 | 10.805530 | 2.625710  |
| O | 5.917252  | 3.684536  | 11.062355 |
| H | 5.156399  | 3.098562  | 11.283195 |
| H | 6.522923  | 3.688722  | 11.785536 |
| O | 3.654662  | 12.217560 | 4.165012  |
| H | 3.395427  | 12.894114 | 4.843839  |
| H | 3.038192  | 11.454539 | 4.139100  |
| O | 11.073363 | 2.114734  | 10.365953 |
| H | 10.106041 | 2.382831  | 10.532665 |
| H | 11.116658 | 2.292497  | 9.404796  |
| O | 8.309854  | 0.423468  | 1.896479  |
| H | 8.322577  | 1.188878  | 1.248355  |
| H | 8.124874  | 0.961740  | 2.692158  |
| O | 10.835159 | 2.204793  | 7.827296  |
| H | 11.149965 | 1.332630  | 7.473531  |
| H | 10.294347 | 2.941127  | 7.307740  |
| O | 9.709649  | 6.828549  | 12.204713 |
| H | 9.549751  | 7.484295  | 12.978492 |
| H | 10.388210 | 7.311061  | 11.649630 |
| O | 8.443425  | 11.548946 | 4.608106  |
| H | 7.662467  | 11.981748 | 4.099323  |
| H | 8.183511  | 11.627557 | 5.603652  |
| O | 10.699801 | 12.210989 | 1.549855  |
| H | 9.777894  | 12.593546 | 1.717201  |
| H | 11.196723 | 12.934675 | 1.100914  |
| O | 3.581836  | 11.171466 | 7.163446  |
| H | 4.429209  | 11.003581 | 6.714072  |
| H | 3.283907  | 12.077207 | 6.868948  |
| O | 6.445223  | 4.499357  | 2.808229  |
| H | 6.514684  | 4.679732  | 1.821225  |
| H | 6.502297  | 3.416221  | 2.982085  |
| O | 6.373263  | 5.766568  | 0.367083  |
| H | 6.976627  | 5.698807  | -0.429931 |
| H | 6.338305  | 6.657270  | 0.808888  |
| O | 5.763594  | 11.808438 | 0.813823  |
| H | 5.332101  | 11.073058 | 0.374339  |
| H | 6.120229  | 12.385689 | 0.082329  |
| O | 6.634440  | 5.804567  | 8.817882  |
| H | 7.199884  | 6.622345  | 8.585733  |
| H | 7.017391  | 5.129004  | 8.206147  |

```
O   8.468065   10.419481   0.083534
H   8.857456   9.604298   0.545436
H   8.232370   10.910603   0.908420
&END COORD
&KIND H
  BASIS__SET DZVP-MOLOPT-SR-GTH-q1
  POTENTIAL GTH-PBE-q1
&END KIND
&KIND C
  BASIS__SET DZVP-MOLOPT-SR-GTH-q4
  POTENTIAL GTH-PBE-q4
&END KIND
&KIND N
  BASIS__SET DZVP-MOLOPT-SR-GTH-q5
  POTENTIAL GTH-PBE-q5
&END KIND
&KIND O
  BASIS__SET DZVP-MOLOPT-SR-GTH-q6
  POTENTIAL GTH-PBE-q6
&END KIND
&KIND Co
  BASIS__SET DZVP-MOLOPT-SR-GTH-q17
  POTENTIAL GTH-PBE-q17
&END KIND
&COLVAR
  &COORDINATION
    ATOMS__FROM 264
    ATOMS__TO 68
    R__0 [angstrom] 2.10
    NN 6
    ND 18
  &END COORDINATION
&END COLVAR
&COLVAR
  &COORDINATION
    ATOMS__FROM 262
    ATOMS__TO 69
    R__0 [angstrom] 2.20
    NN 8
    ND 24
  &END COORDINATION
&END COLVAR
&END SUBSYS
&END FORCE__EVAL

&GLOBAL
  PROJECT co-grap-step1
  RUN__TYPE MD
  PRINT__LEVEL LOW
&END GLOBAL

&MOTION
&MD
  ENSEMBLE NVT
  STEPS 12000
  TIMESTEP 0.5
  TEMPERATURE 300
  TEMP__TOL 5
```

```

&THERMOSTAT
&NOSE
  LENGTH 3
  YOSHIDA 3
  TIMECON 30.0
  MTS 2
&END NOSE
&END
&END MD
&FREE__ENERGY
&METADYN
  DO__HILLS T
  NT__HILLS 5
  WW 5.0e-3
  WELL__TEMPERED
  WTGAMMA 25
&METAVAR
  SCALE 0.1
  COLVAR 1
  MASS 10
&WALL
  TYPE QUADRATIC
  POSITION [angstrom] 2.80
  &QUADRATIC
    DIRECTION WALL__MINUS
    K [kcalmol] 5.0
  &END
&END
&END METAVAR
&METAVAR
  SCALE 0.1
  COLVAR 2
  MASS 10
&WALL
  TYPE QUADRATIC
  POSITION [angstrom] 3.00
  &QUADRATIC
    DIRECTION WALL__MINUS
    K [kcalmol] 5.0
  &END
&END
&END METAVAR
&PRINT
&COLVAR SILENT
  COMMON__ITERATION__LEVELS      3
&END COLVAR
&HILLS SILENT
  COMMON__ITERATION__LEVELS      3
&END HILLS
#  &FREE__ENERGY__INFO SILENT
#  COMMON__ITERATION__LEVELS      3
#  &END FREE__ENERGY__INFO
  &END PRINT
&END METADYN
&END
&PRINT
&TRAJECTORY SILENT
  COMMON__ITERATION__LEVELS      3

```



```
&END TRAJECTORY
&CELL SILENT
  COMMON__ITERATION__LEVELS      3
&END CELL
&VELOCITIES SILENT
  COMMON__ITERATION__LEVELS      3
&END VELOCITIES
&RESTART SILENT
  COMMON__ITERATION__LEVELS      3
&END RESTART
&END PRINT
&END MOTION
```
