# Supplementary material for: Surface-chemistry-driven water dissociation on cobalt-based graphene hybrid from molecular dynamics simulations
Source: Royal Society of Chemistry journal article supplement (doi:10.1039/d2cp03184a), 2022-01-01
Supplement: d2cp03184a1.zip [file d2cp03184a1.zip]

&FORCE_EVAL

METHOD Quickstep

&DFT

LSD

CHARGE 2

MULTIPLICITY 3

BASIS_SET_FILE_NAME /home/softwares/cp2k-6.1/data/BASIS_MOLOPT

POTENTIAL_FILE_NAME /home/softwares/cp2k-6.1/data/GTH_POTENTIALS

WFN_RESTART_FILE_NAME RESTART.wfn

&MGRID

CUTOFF 400

REL_CUTOFF 40

NGRIDS 5

&END MGRID

&QS

METHOD GPW

EPS_DEFAULT 1.0E-12

EXTRAPOLATION ASPC

EXTRAPOLATION_ORDER 3

&END QS

&SCF

MAX_SCF 40

EPS_SCF 1.0E-7

SCF_GUESS RESTART

&OUTER_SCF

EPS_SCF 1.0E-7

MAX_SCF 10

&END OUTER_SCF

&OT

PRECONDITIONER FULL_ALL

MINIMIZER DIIS

N_DIIS 7

&END OT

&END SCF

&XC

&XC_FUNCTIONAL PBE

&END

&VDW_POTENTIAL

POTENTIAL_TYPE PAIR_POTENTIAL

&PAIR_POTENTIAL

TYPE DFTD2

REFERENCE_FUNCTIONAL PBE

&END PAIR_POTENTIAL

&END

&END XC

&PRINT

&LOWDIN

&END

&MULLIKEN

&END MULLIKEN

&END

&END DFT

&SUBSYS

&CELL

ABC 12.73 12.73 12.73

PERIODIC XYZ

&END CELL

&COORD

C 1.160546 9.353213 5.371613

C 1.324170 8.505898 6.530995

C 1.953744 7.112737 6.254045

C 1.372554 6.651041 4.926012

C 1.187254 7.592546 3.850465

C 1.216491 9.021275 4.006654

C 1.736850 6.209560 7.461468

C 1.405978 5.226120 4.768989

C 1.352027 4.338665 5.921669

C 1.642265 4.707699 7.200697

C 1.076776 2.956856 5.654847

C 0.897321 2.457032 4.305866

C 0.957998 3.341896 3.189810

C 1.032896 4.727115 3.521995

C 0.677948 5.671436 2.496174

C 0.915703 7.075999 2.608086

C 1.190589 8.964607 7.862969

C 1.313087 8.101510 9.009796

C 1.466506 6.709324 8.709363

C 1.048528 5.725872 9.682728

C 1.141167 4.345119 9.538034

C 1.314006 3.778322 8.289798

C 1.059715 1.982188 6.679267

C 1.113144 2.322878 8.063836

C 0.780283 2.730700 1.875221

C 0.556601 3.756356 0.778030

C 0.914980 0.644473 6.373044

C 0.959360 1.133267 4.062901

C 0.892901 0.283998 5.089631

C 1.152949 1.352255 9.125617

C 0.937595 1.944688 10.510672

C 0.837230 3.436960 10.720276

C 0.660810 6.292472 10.823940

C 0.422698 7.716880 11.245183

C 1.075748 8.754872 10.247314

C 0.990399 10.325196 8.091377

C 0.893335 11.132207 6.968788

C 0.782453 10.636828 5.678818

C 1.093400 10.004527 2.932047

C 0.964094 9.357644 1.705360

C 0.770416 8.022366 1.513656

C 0.747519 11.614961 4.647823

C 0.891620 11.395251 3.309911

C 0.123177 7.576733 0.195900

C 0.120133 6.114604 0.243920

C 0.730751 1.201194 1.854510

C 0.879846 0.343849 2.842999

C 0.983933 -0.271866 7.425473

C 1.106640 -0.091360 8.824082

C 0.571743 4.010707 11.980573

C 0.291740 5.429399 11.831637

C 0.967821 10.190632 10.272889

C 1.105572 11.101778 9.260490

C 0.369736 5.138941 1.272208

N 3.414337 7.331741 6.153456

C 4.453390 6.440907 6.110343

C 4.460197 5.029667 6.154690

C 5.703723 7.115432 5.962767

C 5.665274 4.416094 5.966585

H 3.569495 4.440015 6.093763

C 6.900640 6.432732 5.837856

H 5.825530 8.158790 6.117792

H 5.710501 3.352141 5.764939

N 6.843682 5.039752 5.833621

C 8.231010 7.027142 5.702621

C 8.495999 8.443100 5.776100

N 9.266346 6.163847 5.537775

O 8.073179 2.553463 5.888252

O 10.381428 3.650651 5.659831

O 8.738786 4.325737 3.831473

O 8.968756 4.618174 7.672766

C 9.802403 8.818292 5.470288

H 7.694004 9.172077 5.993472

C 10.534965 6.601218 5.262304

H 8.897843 2.097636 5.779857

H 9.320695 3.480817 3.616221

H 7.848097 4.406188 3.316852

H 9.972022 4.873806 7.790112

H 8.698655 3.865714 8.239867

C 10.825416 7.947205 5.183948

H 10.016137 9.870893 5.442700

H 11.350431 5.875359 5.166013

H 11.793391 8.395885 5.039369

Co 8.755121 4.345615 5.795444

O 11.158037 8.066751 8.225367

H 11.287082 8.041759 9.190322

H 9.936831 12.642785 6.842613

O 7.864428 5.444974 11.088559

H 8.634106 6.039676 11.339479

H 7.550693 5.591567 10.130933

O 10.912579 4.603919 10.140809

H 10.956012 5.295788 10.796071

H 11.179359 3.777426 10.560032

O 3.885058 5.606363 2.864357

H 3.638554 3.815300 3.666487

H 4.841831 5.314307 2.918831

O 7.484462 11.091526 10.169281

H 7.105693 10.409930 9.510356

H 6.976018 10.970469 10.999342

O 11.692416 8.011202 10.835320

H 12.457196 7.834192 11.476184

H 11.505816 8.872686 11.356940

O 6.620025 3.161240 8.500541

H 6.631415 3.241103 9.501532

H 7.142297 2.342354 8.263769

O 5.759493 2.360853 0.870568

H 4.959504 2.906852 0.819635

H 5.971130 1.843179 0.051499

O 4.045310 2.719281 8.484456

H 3.682185 3.588178 8.500763

H 4.636919 2.914313 8.257790

O 10.887803 12.637846 6.673587

H 10.966234 12.813077 5.691122

H 11.086308 11.088713 7.598607

O 8.675343 2.784101 10.784655

H 8.475033 3.740087 10.610928

H 8.393826 2.527759 11.682376

O 6.948421 8.188755 11.376935

H 7.927340 8.361741 11.283300

H 6.817232 7.255620 11.182018

O 4.076015 8.497825 8.856579

H 3.795948 8.075426 8.025059

H 3.590149 9.312828 8.878506

O 6.079832 0.367271 9.189362

H 5.195911 -0.090942 9.407221

H 6.759536 -0.377158 9.498242

O 7.049069 2.168485 3.612442

H 7.253738 2.383083 4.576986

H 6.535551 1.303159 3.615792

O 10.607390 12.989443 4.072124

H 9.896998 12.244151 4.097761

H 11.359279 12.694746 3.499201

O 11.623149 10.176405 12.418152

H 11.558956 10.858657 11.678243

H 11.146527 10.585136 13.176435

O 10.367250 2.640924 2.974187

H 10.314359 1.646682 3.121542

H 11.217655 2.943347 3.427317

O 11.055379 1.488972 0.129808

H 10.912644 2.290894 0.657335

H 11.446211 1.803386 -0.740479

O 10.519710 5.948532 2.724681

H 10.166412 6.629431 2.140183

H 9.719433 5.525219 3.176325

O 9.438232 9.223940 10.756214

H 8.989966 10.099998 10.679408

H 9.360102 8.809218 9.873500

O 2.738373 4.087837 11.603479

H 2.639790 4.588897 12.505616

H 3.241724 3.196223 11.883936

O 6.091373 12.344028 3.422266

H 6.120562 12.221335 2.411611

H 5.160213 12.333520 3.788180

O 3.330730 10.938871 1.307405

H 3.014854 10.226228 1.886767

H 3.562276 8.631448 4.903672

O 3.660981 1.212080 6.143740

H 4.661441 1.064213 6.280982

H 3.474208 1.759827 6.949608

O 10.654783 10.549089 8.315033

H 11.042108 10.935593 9.163077

H 10.991783 9.019555 8.081367

O 4.045373 11.535599 9.718850

H 4.517540 10.697775 10.024056

H 3.686355 11.442037 8.782594

O 2.148004 6.052577 0.433041

H 3.574751 11.655655 1.892928

H 2.155827 6.646049 1.202871

O 11.416661 11.905636 10.420580

H 10.623981 12.432289 10.682698

H 12.141491 12.565319 10.408415

O 6.886220 9.647428 3.462652

H 6.304522 10.448583 3.503963

H 7.652163 10.010725 3.994223

O 6.104050 8.456458 1.050107

H 6.691931 9.007247 1.610884

H 6.379474 8.791621 0.176158

O 4.114653 5.760557 12.032160

H 5.095079 5.649632 12.449119

H 4.123200 5.558454 10.934808

O 9.220374 -0.005272 11.595005

H 9.223977 -0.834228 12.168912

H 9.870963 0.606859 12.019506

O 3.223466 7.985863 -0.291806

H 3.777668 6.740114 -0.447372

H 3.052290 8.159868 0.661635

O 9.155200 8.351476 1.503193

H 9.593985 8.937857 2.195462

H 8.411582 7.906279 1.990477

O 3.557735 2.189092 11.219187

H 3.685171 2.081931 10.262985

H 3.490600 1.280421 11.562888

O 3.877678 2.844771 3.737858

H 3.652915 2.594541 4.679443

H 3.700231 1.799998 2.605635

O 3.989321 5.457345 9.506777

H 3.610168 6.351493 9.331899

H 4.989271 5.543000 9.234874

O 11.491329 5.423397 7.754004

H 11.606127 5.168013 8.702518

H 11.428649 6.431391 7.820906

O 3.619576 0.985084 1.988971

H 4.290467 3.097480 0.407184

H 4.441636 0.967960 1.464700

O 8.312275 11.533975 7.249351

H 9.090043 11.097597 7.688346

H 8.251953 12.341109 7.797854

O 8.427850 7.761400 8.568455

H 9.292871 7.658953 8.122052

H 7.782474 8.357798 8.163353

O 5.947753 10.636112 6.116030

H 5.358805 10.318355 5.380232

H 6.141495 11.606379 5.992774

O 6.152878 0.665482 6.573643

H 6.197426 0.530396 7.570641

H 6.882742 1.276587 6.348103

O 3.838970 8.271626 2.529398

H 3.990984 7.301448 2.700706

H 4.646069 8.565380 1.933090

O 8.178555 2.753232 0.636004

H 7.233819 2.926458 0.904525

H 8.923656 3.414768 0.841217

O 8.632726 0.987173 8.460997

H 8.615671 0.771935 9.412340

H 9.458091 1.594625 8.206164

O 7.520682 7.070034 2.954214

H 7.163279 6.160270 2.828020

H 6.775942 7.571717 3.354781

O 4.955399 9.841805 11.501919

H 4.449772 8.924321 11.568832

H 5.725065 9.370746 11.163461

O 6.512436 9.567743 8.361327

H 6.484747 10.162319 7.551178

H 5.597298 9.229900 8.517076

O 6.713083 0.748469 11.771338

H 7.729300 0.525691 11.681499

H 6.371106 0.863792 10.845495

O 3.946182 9.612786 4.736053

H 2.108950 5.314826 1.093637

H 3.905692 9.179841 3.847304

O 3.673104 3.727026 0.915666

H 3.542318 5.140658 2.112880

H 3.482088 4.134719 0.065237

O 10.307084 4.193658 0.653174

H 10.557287 4.738637 1.473930

H 10.063437 4.903326 0.052733

O 10.790808 9.885345 2.976851

H 11.667205 9.418871 2.919880

H 10.945815 10.805530 2.625710

O 5.917252 3.684536 11.062355

H 5.156399 3.098562 11.283195

H 6.522923 3.688722 11.785536

O 3.654662 12.217560 4.165012

H 3.395427 12.894114 4.843839

H 3.038192 11.454539 4.139100

O 11.073363 2.114734 10.365953

H 10.106041 2.382831 10.532665

H 11.116658 2.292497 9.404796

O 8.309854 0.423468 1.896479

H 8.322577 1.188878 1.248355

H 8.124874 0.961740 2.692158

O 10.835159 2.204793 7.827296

H 11.149965 1.332630 7.473531

H 10.294347 2.941127 7.307740

O 9.709649 6.828549 12.204713

H 9.549751 7.484295 12.978492

H 10.388210 7.311061 11.649630

O 8.443425 11.548946 4.608106

H 7.662467 11.981748 4.099323

H 8.183511 11.627557 5.603652

O 10.699801 12.210989 1.549855

H 9.777894 12.593546 1.717201

H 11.196723 12.934675 1.100914

O 3.581836 11.171466 7.163446

H 4.429209 11.003581 6.714072

H 3.283907 12.077207 6.868948

O 6.445223 4.499357 2.808229

H 6.514684 4.679732 1.821225

H 6.502297 3.416221 2.982085

O 6.373263 5.766568 0.367083

H 6.976627 5.698807 -0.429931

H 6.338305 6.657270 0.808888

O 5.763594 11.808438 0.813823

H 5.332101 11.073058 0.374339

H 6.120229 12.385689 0.082329

O 6.634440 5.804567 8.817882

H 7.199884 6.622345 8.585733

H 7.017391 5.129004 8.206147

O 8.468065 10.419481 0.083534

H 8.857456 9.604298 0.545436

H 8.232370 10.910603 0.908420

&END COORD

&KIND H

BASIS_SET DZVP-MOLOPT-SR-GTH-q1

POTENTIAL GTH-PBE-q1

&END KIND

&KIND C

BASIS_SET DZVP-MOLOPT-SR-GTH-q4

POTENTIAL GTH-PBE-q4

&END KIND

&KIND N

BASIS_SET DZVP-MOLOPT-SR-GTH-q5

POTENTIAL GTH-PBE-q5

&END KIND

&KIND O

BASIS_SET DZVP-MOLOPT-SR-GTH-q6

POTENTIAL GTH-PBE-q6

&END KIND

&KIND Co

BASIS_SET DZVP-MOLOPT-SR-GTH-q17

POTENTIAL GTH-PBE-q17

&END KIND

&COLVAR

&COORDINATION

ATOMS_FROM 264

ATOMS_TO 68

R_0 [angstrom] 2.10

NN 6

ND 18

&END COORDINATION

&END COLVAR

&COLVAR

&COORDINATION

ATOMS_FROM 262

ATOMS_TO 69

R_0 [angstrom] 2.20

NN 8

ND 24

&END COORDINATION

&END COLVAR

&END SUBSYS

&END FORCE_EVAL

&GLOBAL

PROJECT co-grap-step1

RUN_TYPE MD

PRINT_LEVEL LOW

&END GLOBAL

&MOTION

&MD

ENSEMBLE NVT

STEPS 12000

TIMESTEP 0.5

TEMPERATURE 300

TEMP_TOL 5

&THERMOSTAT

&NOSE

LENGTH 3

YOSHIDA 3

TIMECON 30.0

MTS 2

&END NOSE

&END

&END MD

&FREE_ENERGY

&METADYN

DO_HILLS T

NT_HILLS 5

WW 5.0e-3

WELL_TEMPERED

WTGAMMA 25

&METAVAR

SCALE 0.1

COLVAR 1

MASS 10

&WALL

TYPE QUADRATIC

POSITION [angstrom] 2.80

&QUADRATIC

DIRECTION WALL_MINUS

K [kcalmol] 5.0

&END

&END

&END METAVAR

&METAVAR

SCALE 0.1

COLVAR 2

MASS 10

&WALL

TYPE QUADRATIC

POSITION [angstrom] 3.00

&QUADRATIC

DIRECTION WALL_MINUS

K [kcalmol] 5.0

&END

&END

&END METAVAR

&PRINT

&COLVAR SILENT

COMMON_ITERATION_LEVELS 3

&END COLVAR

&HILLS SILENT

COMMON_ITERATION_LEVELS 3

&END HILLS

# &FREE_ENERGY_INFO SILENT

# COMMON_ITERATION_LEVELS 3

# &END FREE_ENERGY_INFO

&END PRINT

&END METADYN

&END

&PRINT

&TRAJECTORY SILENT

COMMON_ITERATION_LEVELS 3

&END TRAJECTORY

&CELL SILENT

COMMON_ITERATION_LEVELS 3

&END CELL

&VELOCITIES SILENT

COMMON_ITERATION_LEVELS 3

&END VELOCITIES

&RESTART SILENT

COMMON_ITERATION_LEVELS 3

&END RESTART

&END PRINT

&END MOTION
