# Supplementary material for: Surface-chemistry-driven water dissociation on cobalt-based graphene hybrid from molecular dynamics simulations
Source: Royal Society of Chemistry journal article supplement (doi:10.1039/d2cp03184a), 2022-01-01
Supplement: d2cp03184a1.zip [file d2cp03184a1.zip]

```

&FORCE_EVAL
  METHOD Quickstep

&DFT
  LSD
  CHARGE 2
  MULTIPLICITY 3
  BASIS_SET_FILE_NAME /home/gkr/softwares/cp2k-6.1/data/BASIS_MOLOPT
  POTENTIAL_FILE_NAME /home/gkr/softwares/cp2k-6.1/data/GTH_POTENTIALS
  WFN_RESTART_FILE_NAME RESTART.wfn
  &MGRID
    CUTOFF 400
    REL_CUTOFF 40
    NGRIDS 5
  &END MGRID
  &QS
    METHOD GPW
    EPS_DEFAULT 1.0E-12
    EXTRAPOLATION ASPC
    EXTRAPOLATION_ORDER 3
  &END QS
  &SCF
    MAX_SCF 40
    EPS_SCF 1.0E-7
    SCF_GUESS RESTART
  &OUTER_SCF
    EPS_SCF 1.0E-7
    MAX_SCF 10
  &END OUTER_SCF
  &OT
    PRECONDITIONER FULL_ALL
    MINIMIZER DIIS
    N_DIIS 7
  &END OT
  &END SCF

&XC
  &XC_FUNCTIONAL PBE
  &END
  &VDW_POTENTIAL
    POTENTIAL_TYPE PAIR_POTENTIAL
    &PAIR_POTENTIAL
      TYPE DFTD2
      REFERENCE_FUNCTIONAL PBE
    &END PAIR_POTENTIAL
  &END
  &END XC

&PRINT
  &LOWDIN
  &END
  &MULLIKEN
  &END MULLIKEN
  &END
&END DFT

&SUBSYS
  &CELL
    ABC 12.73 12.73 12.73
    PERIODIC XYZ
  &END CELL
&COORD
C 1.295245 9.615006 5.806725
C 1.512430 8.765901 6.891903
C 1.890746 7.335093 6.609513
C 1.414807 6.900164 5.298166

```

|   |           |           |           |
|---|-----------|-----------|-----------|
| C | 1.154629  | 7.836567  | 4.220885  |
| C | 1.151928  | 9.261353  | 4.408970  |
| C | 1.576360  | 6.443062  | 7.776932  |
| C | 1.191209  | 5.505285  | 5.127116  |
| C | 1.193706  | 4.551841  | 6.260444  |
| C | 1.420530  | 5.007652  | 7.576060  |
| C | 0.897598  | 3.194433  | 5.966729  |
| C | 0.639532  | 2.735718  | 4.625173  |
| C | 0.611899  | 3.612735  | 3.512275  |
| C | 0.820312  | 5.022932  | 3.842180  |
| C | 0.579969  | 5.947371  | 2.818337  |
| C | 0.674666  | 7.378334  | 2.954575  |
| C | 1.479521  | 9.232447  | 8.241567  |
| C | 1.391781  | 8.372469  | 9.400409  |
| C | 1.425939  | 6.964509  | 9.045823  |
| C | 1.156712  | 6.026176  | 10.050475 |
| C | 1.061926  | 4.585285  | 9.930324  |
| C | 1.228330  | 4.039587  | 8.659665  |
| C | 0.863989  | 2.303565  | 7.075348  |
| C | 1.036070  | 2.669617  | 8.390418  |
| C | 0.500060  | 2.945475  | 2.121536  |
| C | 0.381676  | 4.051102  | 1.070466  |
| C | 0.760197  | 0.948879  | 6.800054  |
| C | 0.562193  | 1.368466  | 4.398622  |
| C | 0.729331  | 0.510191  | 5.484066  |
| C | 0.913142  | 1.635256  | 9.533343  |
| C | 0.675763  | 2.267656  | 10.738759 |
| C | 0.666769  | 3.656551  | 11.052999 |
| C | 0.629372  | 6.546103  | 11.232795 |
| C | 0.386800  | 8.020600  | 11.604003 |
| C | 1.082738  | 8.966096  | 10.612706 |
| C | 1.292693  | 10.650541 | 8.460885  |
| C | 1.020789  | 11.431869 | 7.324388  |
| C | 1.090990  | 10.964702 | 6.055570  |
| C | 0.796047  | 10.247252 | 3.350371  |
| C | 0.602259  | 9.617006  | 2.123129  |
| C | 0.543486  | 8.313978  | 1.873531  |
| C | 0.832474  | 11.888336 | 5.024339  |
| C | 0.727676  | 11.675612 | 3.676747  |
| C | -0.004413 | 7.794908  | 0.524227  |
| C | -0.030463 | 6.325339  | 0.620307  |
| C | 0.451704  | 1.505656  | 2.122934  |
| C | 0.566787  | 0.597741  | 3.154902  |
| C | 0.823565  | 0.008132  | 7.798153  |
| C | 0.935474  | 0.159937  | 9.171403  |
| C | 0.442294  | 4.215892  | 12.356597 |
| C | 0.257415  | 5.643097  | 12.191072 |
| C | 0.917486  | 10.521514 | 10.794486 |
| C | 1.178744  | 11.404878 | 9.713988  |
| C | 0.214203  | 5.389571  | 1.609247  |
| N | 3.426906  | 7.474614  | 6.605038  |
| C | 4.535390  | 6.637462  | 6.364197  |
| C | 4.502343  | 5.251719  | 6.392179  |
| C | 5.768331  | 7.317132  | 6.015160  |
| C | 5.683550  | 4.583053  | 6.163950  |
| H | 3.697183  | 4.613246  | 6.731235  |
| C | 6.860034  | 6.561180  | 5.804834  |
| H | 5.860813  | 8.393003  | 5.911374  |
| H | 5.627635  | 3.501531  | 6.071458  |
| N | 6.847191  | 5.195803  | 5.896981  |
| C | 8.192736  | 7.122874  | 5.604273  |
| C | 8.529446  | 8.426921  | 5.807252  |
| N | 9.169519  | 6.128846  | 5.500540  |
| O | 7.793141  | 2.601273  | 5.840300  |
| O | 10.265977 | 3.491322  | 5.500856  |
| O | 8.257155  | 4.215267  | 3.650274  |

|    |           |           |           |
|----|-----------|-----------|-----------|
| O  | 8.640236  | 4.437449  | 7.627783  |
| C  | 9.856054  | 8.754395  | 5.760550  |
| H  | 7.774739  | 9.165370  | 5.932716  |
| C  | 10.464417 | 6.493339  | 5.335218  |
| H  | 7.161781  | 2.383296  | 4.941915  |
| H  | 8.704396  | 3.347981  | 3.347236  |
| H  | 7.251405  | 4.143096  | 3.371707  |
| H  | 9.583316  | 4.243771  | 7.871379  |
| H  | 7.815289  | 3.759036  | 8.136874  |
| C  | 10.818289 | 7.818561  | 5.437760  |
| H  | 10.115939 | 9.811387  | 5.636466  |
| H  | 11.159387 | 5.708351  | 5.098722  |
| H  | 11.831157 | 8.127020  | 5.246331  |
| Co | 8.466334  | 4.328080  | 5.691466  |
| O  | 11.160275 | 6.929748  | 8.570827  |
| H  | 11.269433 | 6.893382  | 9.576385  |
| H  | 10.805401 | 12.195208 | 5.739795  |
| O  | 8.094541  | 5.190529  | 10.748919 |
| H  | 8.968001  | 5.514729  | 10.474093 |
| H  | 7.410246  | 5.362667  | 9.944148  |
| O  | 10.610281 | 5.460627  | 10.726241 |
| H  | 10.527409 | 4.914907  | 11.573855 |
| H  | 10.997878 | 4.693872  | 10.216729 |
| O  | 3.726624  | 6.379367  | 3.144712  |
| H  | 3.241490  | 3.119753  | 5.331633  |
| H  | 4.688752  | 6.098692  | 3.157048  |
| O  | 7.762424  | 11.041161 | 10.102973 |
| H  | 7.200211  | 10.291184 | 9.865758  |
| H  | 7.303514  | 11.662718 | 10.747802 |
| O  | 11.686345 | 8.117149  | 11.110869 |
| H  | 12.806440 | 9.986127  | 11.607265 |
| H  | 11.445365 | 9.077517  | 11.148952 |
| O  | 7.104657  | 2.933511  | 8.733033  |
| H  | 6.746959  | 3.086625  | 9.646274  |
| H  | 7.605890  | 2.108115  | 8.661942  |
| O  | 5.248665  | 1.452506  | 0.995207  |
| H  | 4.587965  | 2.106543  | 1.436166  |
| H  | 4.776537  | 1.031217  | 0.223357  |
| O  | 3.796269  | 1.755426  | 9.170136  |
| H  | 3.274739  | 2.544917  | 9.121562  |
| H  | 4.716364  | 2.022700  | 9.219432  |
| O  | 10.630688 | 11.786171 | 6.620839  |
| H  | 11.218659 | 11.114172 | 6.957370  |
| H  | 12.049689 | 9.861979  | 8.241323  |
| O  | 8.495468  | 2.631171  | 10.968982 |
| H  | 8.146660  | 4.181247  | 10.873126 |
| H  | 8.519496  | 2.256748  | 11.857455 |
| O  | 6.841845  | 8.361183  | 11.497909 |
| H  | 7.746469  | 7.969546  | 11.688420 |
| H  | 6.277559  | 7.561378  | 11.563180 |
| O  | 4.468414  | 7.554437  | 9.294070  |
| H  | 3.839213  | 7.785798  | 8.554049  |
| H  | 3.873049  | 7.784320  | 10.151378 |
| O  | 5.832141  | -0.030964 | 9.029727  |
| H  | 5.440795  | -0.909805 | 8.770585  |
| H  | 6.744511  | -0.375995 | 9.176688  |
| O  | 6.127518  | 2.120897  | 4.002549  |
| H  | 5.206415  | 2.280191  | 4.369519  |
| H  | 6.075081  | 1.264554  | 3.512904  |
| O  | 10.515839 | 13.023688 | 4.271388  |
| H  | 9.658674  | 12.854193 | 3.750296  |
| H  | 11.202704 | 12.660647 | 3.726096  |
| O  | 13.158558 | 10.883771 | 11.901769 |
| H  | 11.509089 | 12.048338 | 10.173888 |
| H  | 13.635022 | 10.595582 | 13.036298 |
| O  | 10.016574 | 2.371620  | 3.201635  |

|   |           |           |           |
|---|-----------|-----------|-----------|
| H | 10.903786 | 1.970323  | 3.085934  |
| H | 10.492521 | 3.287694  | 3.110575  |
| O | 10.963606 | 1.725163  | 0.443316  |
| H | 10.771935 | 1.968366  | 1.436259  |
| H | 11.922233 | 1.816933  | 0.343288  |
| O | 10.321221 | 5.340629  | 2.645903  |
| H | 10.480770 | 6.281837  | 2.473875  |
| H | 9.379848  | 5.271522  | 3.023415  |
| O | 9.542128  | 9.414916  | 11.218781 |
| H | 8.902709  | 10.033745 | 10.779801 |
| H | 9.372944  | 8.657618  | 10.642240 |
| O | 3.428536  | 3.526563  | 12.117782 |
| H | 2.975615  | 3.992711  | 11.376063 |
| H | 2.782116  | 2.772244  | 12.256133 |
| O | 6.061932  | 12.229077 | 3.458636  |
| H | 5.948633  | 11.697329 | 2.630050  |
| H | 5.229221  | 11.996521 | 3.950830  |
| O | 2.619420  | 10.924679 | 0.786611  |
| H | 3.250688  | 9.758048  | 1.516062  |
| H | 2.610336  | 10.231954 | 1.645270  |
| O | 3.655256  | 0.504660  | 6.762290  |
| H | 4.617376  | 0.824817  | 6.767337  |
| H | 3.349697  | 0.907469  | 7.618742  |
| O | 11.051475 | 9.804614  | 8.299651  |
| H | 10.757169 | 10.410253 | 8.997304  |
| H | 11.105969 | 7.890950  | 8.285535  |
| O | 3.893331  | 12.804030 | 11.363070 |
| H | 4.133895  | 11.861765 | 11.570325 |
| H | 4.290867  | 13.060820 | 10.505275 |
| O | 3.169717  | 6.240026  | 0.693075  |
| H | 2.852764  | 11.770894 | 1.303339  |
| H | 3.388801  | 6.154384  | 1.708195  |
| O | 10.684524 | 12.019542 | 9.842820  |
| H | 10.155673 | 11.897583 | 10.736569 |
| H | 12.643847 | 8.108871  | 11.440160 |
| O | 6.496258  | 9.232074  | 3.632157  |
| H | 5.156844  | 9.258810  | 4.276328  |
| H | 7.068459  | 10.031180 | 3.921113  |
| O | 5.943135  | 8.311709  | 1.284775  |
| H | 6.218156  | 9.261213  | 2.654743  |
| H | 6.038494  | 8.542846  | 0.285855  |
| O | 5.224572  | 5.909602  | 11.789260 |
| H | 5.137366  | 5.338428  | 11.026422 |
| H | 4.479489  | 5.960456  | 12.459178 |
| O | 9.486544  | -0.418721 | 12.201865 |
| H | 9.195362  | -1.167052 | 12.734633 |
| H | 10.019064 | 0.165751  | 12.763793 |
| O | 3.173346  | 8.128983  | -1.183050 |
| H | 3.046667  | 7.473969  | -0.474703 |
| H | 3.626792  | 8.952398  | -0.893117 |
| O | 10.008776 | 7.883278  | 2.041095  |
| H | 10.379587 | 8.687965  | 2.560496  |
| H | 9.170377  | 7.741973  | 2.509526  |
| O | 1.990541  | 1.357638  | 12.729947 |
| H | 2.408287  | 0.730322  | 12.143075 |
| H | 2.339452  | 1.008888  | 13.577720 |
| O | 3.617286  | 2.355610  | 4.865363  |
| H | 3.516362  | 1.574059  | 5.484422  |
| H | 2.866073  | 0.003919  | 3.143400  |
| O | 3.940511  | 4.450667  | 9.223596  |
| H | 3.471374  | 5.335325  | 9.279956  |
| H | 4.880857  | 4.713206  | 9.049520  |
| O | 11.278962 | 4.393475  | 7.967062  |
| H | 11.302235 | 4.040169  | 7.023999  |
| H | 11.462586 | 5.464740  | 7.889805  |
| O | 3.261708  | 0.311640  | 2.319210  |

|   |           |           |           |
|---|-----------|-----------|-----------|
| H | 3.415730  | 2.684001  | 3.246825  |
| H | 4.235627  | 0.259156  | 2.400936  |
| O | 8.258201  | 11.347948 | 7.269782  |
| H | 9.177105  | 11.593890 | 6.873250  |
| H | 8.503663  | 10.685147 | 7.917837  |
| O | 8.456386  | 7.660965  | 9.125648  |
| H | 9.074698  | 7.366241  | 8.414271  |
| H | 7.763744  | 8.230092  | 8.712012  |
| O | 5.903117  | 10.738848 | 6.239005  |
| H | 4.927276  | 10.878242 | 6.148287  |
| H | 6.231785  | 11.663809 | 6.128217  |
| O | 6.146087  | 0.888985  | 6.706825  |
| H | 6.094845  | 0.722603  | 7.727904  |
| H | 6.724612  | 1.698013  | 6.741022  |
| O | 3.574946  | 8.861146  | 1.967443  |
| H | 2.760678  | 8.321888  | 2.056805  |
| H | 4.894225  | 8.278081  | 1.416424  |
| O | 7.659000  | 2.477845  | 1.090928  |
| H | 6.784613  | 1.969779  | 0.879237  |
| H | 7.452308  | 3.449445  | 0.972451  |
| O | 8.563681  | 1.102851  | 8.244422  |
| H | 9.443010  | 1.343338  | 8.464658  |
| H | 8.341030  | 0.069552  | 8.000053  |
| O | 7.692000  | 6.967589  | 2.988216  |
| H | 7.301419  | 7.000115  | 2.078038  |
| H | 7.418454  | 7.810827  | 3.290706  |
| O | 4.763004  | 10.200664 | 11.647344 |
| H | 5.049381  | 10.279114 | 12.611136 |
| H | 5.640124  | 9.972111  | 11.202405 |
| O | 6.332425  | 9.227698  | 8.476855  |
| H | 5.937600  | 9.754245  | 7.705385  |
| H | 5.615939  | 8.711523  | 8.869418  |
| O | 6.833807  | 0.119205  | 11.962747 |
| H | 7.735138  | 0.456612  | 12.022235 |
| H | 6.292011  | 0.677973  | 11.314595 |
| O | 4.117402  | 9.272435  | 4.604179  |
| H | 2.621554  | 5.428463  | 0.555398  |
| H | 3.692799  | 8.745666  | 3.836357  |
| O | 3.675531  | 3.165043  | 2.375801  |
| H | 3.289122  | 5.845798  | 3.816069  |
| H | 2.898616  | 3.165138  | 1.774994  |
| O | 9.960137  | 4.289613  | 0.142106  |
| H | 10.231309 | 3.309135  | 0.025079  |
| H | 10.209414 | 4.513370  | 1.039235  |
| O | 10.515134 | 10.181380 | 3.084793  |
| H | 9.789829  | 10.700548 | 3.515119  |
| H | 11.006434 | 10.763854 | 2.452677  |
| O | 5.736426  | 2.783552  | 11.254514 |
| H | 4.809617  | 3.104544  | 11.563758 |
| H | 6.168914  | 2.564219  | 12.082808 |
| O | 3.821641  | 11.840248 | 4.600304  |
| H | 3.481783  | 12.240753 | 5.455432  |
| H | 3.781534  | 10.719114 | 4.527415  |
| O | 10.533278 | 2.330532  | 9.360610  |
| H | 9.248343  | 2.318545  | 10.428641 |
| H | 10.975911 | 1.441981  | 9.309648  |
| O | 8.573833  | 0.240234  | 2.372934  |
| H | 8.757870  | 1.168373  | 2.121304  |
| H | 7.593790  | 0.198443  | 2.525443  |
| O | 10.358540 | 2.115881  | 6.126764  |
| H | 10.458975 | 1.471310  | 5.410792  |
| H | 8.565175  | 1.970239  | 5.966554  |
| O | 8.993416  | 7.032263  | 12.582931 |
| H | 9.483416  | 7.505016  | 13.310910 |
| H | 9.670489  | 6.977175  | 11.888303 |
| O | 8.293687  | 11.216864 | 4.395081  |

|   |           |           |          |
|---|-----------|-----------|----------|
| H | 7.449016  | 11.684912 | 4.192940 |
| H | 8.296045  | 11.113258 | 5.362721 |
| O | 11.523797 | 11.656820 | 1.205958 |
| H | 12.013931 | 11.108151 | 0.503864 |
| H | 11.666108 | 12.577758 | 0.906608 |
| O | 4.022714  | 10.831025 | 8.609773 |
| H | 3.458062  | 11.548052 | 8.298566 |
| H | 3.704189  | 10.662058 | 9.504138 |
| O | 5.876256  | 4.797984  | 2.935742 |
| H | 6.383591  | 5.081573  | 2.137299 |
| H | 5.218149  | 4.164081  | 2.573832 |
| O | 7.243074  | 5.102262  | 0.723942 |
| H | 7.938812  | 5.707326  | 0.335811 |
| H | 6.546419  | 5.170652  | 0.067779 |
| O | 6.078323  | 11.161006 | 1.132595 |
| H | 6.977723  | 10.645358 | 1.041405 |
| H | 6.250273  | 12.092443 | 0.610869 |
| O | 6.456561  | 5.762594  | 8.971597 |
| H | 5.984359  | 6.619487  | 9.102719 |
| H | 6.946182  | 5.972434  | 8.171048 |
| O | 8.469865  | 10.086907 | 0.918942 |
| H | 8.777534  | 9.614230  | 0.079908 |
| H | 9.148932  | 10.012692 | 1.619550 |

```
&END COORD
&KIND H
  BASIS_SET DZVP-MOLOPT-SR-GTH-q1
  POTENTIAL GTH-PBE-q1
&END KIND
&KIND C
  BASIS_SET DZVP-MOLOPT-SR-GTH-q4
  POTENTIAL GTH-PBE-q4
&END KIND
&KIND N
  BASIS_SET DZVP-MOLOPT-SR-GTH-q5
  POTENTIAL GTH-PBE-q5
&END KIND
&KIND O
  BASIS_SET DZVP-MOLOPT-SR-GTH-q6
  POTENTIAL GTH-PBE-q6
&END KIND
&KIND Co
  BASIS_SET DZVP-MOLOPT-SR-GTH-q17
  POTENTIAL GTH-PBE-q17
&END KIND
&COLVAR
  &COORDINATION
    ATOMS_FROM 263
    ATOMS_TO 136
    R_0 [angstrom] 2.00
    NN 6
    ND 18
  &END COORDINATION
&END COLVAR
&COLVAR
  &COORDINATION
    ATOMS_FROM 262
    ATOMS_TO 263
    R_0 [angstrom] 2.10
    NN 6
    ND 18
  &END COORDINATION
&END COLVAR
&END SUBSYS
&END FORCE_EVAL
```

```
&GLOBAL
```

```

PROJECT co-grap-step2
RUN_TYPE MD
PRINT_LEVEL LOW
&END GLOBAL

&MOTION
&CONSTRAINT
&FIXED_ATOMS
LIST 136
&END
&END
&MD
  ENSEMBLE NVT
  STEPS 8000
  TIMESTEP 0.5
  TEMPERATURE 300
  TEMP_TOL 5
  &THERMOSTAT
    &NOSE
      LENGTH 3
      YOSHIDA 3
      TIMECON 30.0
      MTS 2
    &END NOSE
  &END
&END MD
&FREE_ENERGY
&METADYN
  DO_HILLS T
  NT_HILLS 5
  WW 5.0e-3
  WELL_TEMPERED
  WTGAMMA 25
  &METAVAR
    SCALE 0.1
    COLVAR 1
    MASS 10
  &END METAVAR
  &METAVAR
    SCALE 0.1
    COLVAR 2
    MASS 10
  &END METAVAR
  &PRINT
    &COLVAR SILENT
      COMMON_ITERATION_LEVELS      3
    &END COLVAR
    &HILLS SILENT
      COMMON_ITERATION_LEVELS      3
    &END HILLS
#   &FREE_ENERGY_INFO SILENT
#   COMMON_ITERATION_LEVELS      3
#   &END FREE_ENERGY_INFO
  &END PRINT
&END METADYN
&END
&PRINT
  &TRAJECTORY SILENT
    COMMON_ITERATION_LEVELS      3
  &END TRAJECTORY
  &CELL SILENT
    COMMON_ITERATION_LEVELS      3
  &END CELL
  &VELOCITIES SILENT
    COMMON_ITERATION_LEVELS      3
  &END VELOCITIES

```

```
&RESTART SILENT
COMMON_ITERATION_LEVELS      3
&END RESTART
&END PRINT
&END MOTION
```
