# Supplementary material for: Surface-chemistry-driven water dissociation on cobalt-based graphene hybrid from molecular dynamics simulations
Source: Royal Society of Chemistry journal article supplement (doi:10.1039/d2cp03184a), 2022-01-01
Supplement: d2cp03184a1.zip [file d2cp03184a1.zip]

```

&FORCE_EVAL
METHOD Quickstep
&DFT
LSD
CHARGE 2
MULTIPLICITY 3
BASIS_SET_FILE_NAME /home/software/cp2k-6.1/data/BASIS_MOLOPT
POTENTIAL_FILE_NAME /home/software/cp2k-6.1/data/GTH_POTENTIALS
WFN_RESTART_FILE_NAME RESTART.wfn
&MGRID
CUTOFF 400
REL_CUTOFF 40
NGRIDS 5
&END MGRID
&QS
METHOD GPW
EPS_DEFAULT 1.0E-12
EXTRAPOLATION ASPC
EXTRAPOLATION_ORDER 3
&END QS
&SCF
MAX_SCF 40
EPS_SCF 1.0E-7
SCF_GUESS RESTART
&OUTER_SCF
EPS_SCF 1.0E-7
MAX_SCF 10
&END OUTER_SCF
&OT
PRECONDITIONER FULL_ALL
MINIMIZER DIIS
N_DIIS 7
&END OT
&END SCF

&XC
&XC_FUNCTIONAL PBE ! PBE functional + ...
&END
&VDW_POTENTIAL ! ... dispersion interactions
POTENTIAL_TYPE PAIR_POTENTIAL
&PAIR_POTENTIAL
TYPE DFTD2 ! computed with the DFTD2 method
REFERENCE_FUNCTIONAL PBE
&END PAIR_POTENTIAL
&END
&END XC
&END DFT

&SUBSYS
&CELL
ABC 12.73 12.73 12.73
PERIODIC XYZ
&END CELL

&COORD
C 0.880000 9.929999 5.500000
C 1.190000 9.000000 6.580000
C 1.690000 7.530000 6.250000
C 1.120000 7.030000 4.870000
C 0.820000 8.000000 3.820000
C 0.740000 9.430000 4.110000
C 1.330000 6.540000 7.420000
C 0.950000 5.610000 4.650000
C 1.000000 4.660000 5.760000
C 1.140000 5.130000 7.140000
C 0.880000 3.230000 5.500000

```

|   |           |           |           |
|---|-----------|-----------|-----------|
| C | 0.730000  | 2.750000  | 4.130000  |
| C | 0.650000  | 3.710000  | 3.020000  |
| C | 0.720000  | 5.130000  | 3.290000  |
| C | 0.570000  | 6.090000  | 2.190000  |
| C | 0.590000  | 7.530000  | 2.460000  |
| C | 1.070000  | 9.450000  | 7.960000  |
| C | 1.120000  | 8.480000  | 9.060000  |
| C | 1.200000  | 7.040000  | 8.790000  |
| C | 1.130000  | 6.100000  | 9.900000  |
| C | 1.100000  | 4.660000  | 9.630000  |
| C | 1.070000  | 4.190000  | 8.250000  |
| C | 0.900000  | 2.280000  | 6.600000  |
| C | 0.990000  | 2.760000  | 7.990000  |
| C | 0.490000  | 3.240000  | 1.650000  |
| C | 0.400000  | 4.280000  | 0.830000  |
| C | 0.830000  | 0.850000  | 6.320000  |
| C | 0.670000  | 1.320000  | 3.870000  |
| C | 0.740000  | 0.650000  | 5.020000  |
| C | 0.990000  | 1.820000  | 9.100000  |
| C | 1.040000  | 2.480000  | 10.250000 |
| C | 1.070000  | 3.710000  | 10.730000 |
| C | 1.100000  | 6.600000  | 11.280001 |
| C | 1.080000  | 7.920000  | 11.280001 |
| C | 1.050000  | 8.950000  | 10.450000 |
| C | 0.890000  | 10.880001 | 8.230000  |
| C | 0.760000  | 11.540001 | 7.100000  |
| C | 0.700000  | 11.350000 | 5.790000  |
| C | 0.500000  | 10.380000 | 3.020000  |
| C | 0.390000  | 9.720000  | 1.880000  |
| C | 0.390000  | 8.500000  | 1.380000  |
| C | 0.520000  | 12.030000 | 4.670000  |
| C | 0.440000  | 11.619999 | 3.490000  |
| C | 0.270000  | 7.850000  | 0.230000  |
| C | 0.260000  | 6.620000  | 0.000000  |
| C | 0.480000  | 1.910000  | 1.630000  |
| C | 0.560000  | 1.100000  | 2.570000  |
| C | 0.870000  | 0.170000  | 7.460000  |
| C | 0.940000  | 0.570000  | 8.640000  |
| C | 1.090000  | 4.350000  | 11.890000 |
| C | 1.100000  | 5.580000  | 12.120000 |
| C | 0.960000  | 10.270000 | 10.480000 |
| C | 0.890000  | 11.090000 | 9.540000  |
| C | 0.390000  | 5.600000  | 0.830000  |
| N | 3.180000  | 7.650000  | 6.080000  |
| C | 4.280000  | 6.810000  | 6.040000  |
| C | 4.400000  | 5.370000  | 6.060000  |
| C | 5.470000  | 7.500000  | 5.920000  |
| C | 5.680000  | 4.780000  | 5.920000  |
| H | 3.550000  | 4.740000  | 6.190000  |
| C | 6.600000  | 6.850000  | 5.830000  |
| H | 5.480000  | 8.550000  | 5.920000  |
| H | 5.800000  | 3.700000  | 5.900000  |
| N | 6.770000  | 5.580000  | 5.820000  |
| C | 7.870000  | 7.450000  | 5.720000  |
| C | 8.090000  | 8.770000  | 5.690000  |
| N | 8.750000  | 6.520000  | 5.650000  |
| O | 8.230000  | 2.960000  | 5.670000  |
| O | 10.050000 | 4.130000  | 5.850000  |
| O | 9.180000  | 4.460000  | 3.660000  |
| O | 9.180000  | 4.630000  | 7.440000  |
| C | 9.400000  | 9.190001  | 5.620000  |
| H | 7.280000  | 9.450000  | 5.730000  |
| C | 10.039999 | 6.850000  | 5.570000  |
| H | 8.809999  | 2.200000  | 5.770000  |
| H | 10.080000 | 4.490000  | 3.350000  |
| H | 8.750000  | 3.650000  | 3.380000  |

|    |           |           |           |
|----|-----------|-----------|-----------|
| H  | 10.130000 | 4.640000  | 7.620000  |
| H  | 8.809999  | 3.810000  | 7.780000  |
| C  | 10.369999 | 8.230000  | 5.570000  |
| H  | 9.639999  | 10.240001 | 5.620000  |
| H  | 10.809999 | 6.090000  | 5.510000  |
| H  | 11.400000 | 8.530000  | 5.530000  |
| Co | 8.430000  | 4.710000  | 5.530000  |
| O  | 12.404098 | 9.332770  | 9.447946  |
| H  | 11.923949 | 8.499675  | 9.068308  |
| H  | 12.162019 | 9.897792  | 9.097250  |
| O  | 8.286545  | 5.348079  | 10.851565 |
| H  | 9.069373  | 5.949940  | 10.693591 |
| H  | 7.726088  | 5.415790  | 10.071713 |
| O  | 11.281870 | 5.050102  | 10.869153 |
| H  | 10.737642 | 4.765806  | 11.633730 |
| H  | 11.177316 | 4.574296  | 10.044624 |
| O  | 3.588240  | 5.606637  | 3.146801  |
| H  | 3.263690  | 5.362759  | 4.040280  |
| H  | 4.579387  | 5.412274  | 3.117908  |
| O  | 5.857522  | 10.711571 | 10.624726 |
| H  | 6.402214  | 10.239841 | 9.914412  |
| H  | 6.409789  | 10.675488 | 11.467713 |
| O  | 12.366385 | 12.058693 | 12.824754 |
| H  | 13.399948 | 11.925178 | 12.969203 |
| H  | 11.961684 | 11.114391 | 12.716013 |
| O  | 6.707994  | 3.479222  | 8.839972  |
| H  | 6.611348  | 3.347001  | 9.798984  |
| H  | 7.432682  | 2.887933  | 8.484090  |
| O  | 5.471995  | 2.373734  | 1.772371  |
| H  | 4.753633  | 3.026297  | 1.507735  |
| H  | 5.392340  | 1.633820  | 1.098818  |
| O  | 3.955551  | 3.816030  | 8.363642  |
| H  | 3.819342  | 4.751440  | 8.633911  |
| H  | 4.933250  | 3.770520  | 8.372482  |
| O  | 10.544162 | 11.751232 | 7.400161  |
| H  | 10.724796 | 12.192279 | 6.516649  |
| H  | 10.781874 | 10.732900 | 7.532798  |
| O  | 9.669894  | 2.602030  | 10.525193 |
| H  | 9.044835  | 3.305825  | 10.868420 |
| H  | 10.166478 | 2.294454  | 11.349806 |
| O  | 7.034010  | 8.274551  | 10.885018 |
| H  | 6.980515  | 7.518046  | 10.249358 |
| H  | 7.440249  | 7.949741  | 11.706105 |
| O  | 4.284448  | 9.162192  | 8.663743  |
| H  | 3.657076  | 8.697364  | 8.058378  |
| H  | 4.145706  | 10.070763 | 8.498639  |
| O  | 5.972058  | 0.614543  | 9.218296  |
| H  | 5.314219  | 1.223690  | 9.647124  |
| H  | 6.198081  | -0.058803 | 9.860693  |
| O  | 7.355778  | 2.533702  | 3.268481  |
| H  | 7.611379  | 2.362614  | 4.261191  |
| H  | 6.473466  | 2.227802  | 2.962226  |
| O  | 10.331949 | 12.387435 | 4.762896  |
| H  | 9.362175  | 12.118032 | 4.981767  |
| H  | 10.530723 | 12.037282 | 3.828362  |
| O  | 10.845941 | 10.062298 | 12.029486 |
| H  | 10.890564 | 9.158543  | 11.706609 |
| H  | 10.132658 | 10.404480 | 11.395255 |
| O  | 10.289761 | 1.998159  | 2.897460  |
| H  | 9.851845  | 1.556696  | 3.663063  |
| H  | 11.180053 | 1.633564  | 2.941514  |
| O  | 10.764009 | 2.039192  | 0.068647  |
| H  | 10.109786 | 1.762525  | 0.759856  |
| H  | 11.495730 | 1.355284  | -0.003068 |
| O  | 10.418432 | 6.562651  | 2.649082  |
| H  | 10.891055 | 7.340462  | 2.259623  |

|   |           |           |           |
|---|-----------|-----------|-----------|
| H | 9.472508  | 6.845689  | 2.818567  |
| O | 8.904014  | 10.187630 | 10.391479 |
| H | 8.540599  | 10.805346 | 9.657059  |
| H | 8.116128  | 9.522020  | 10.577090 |
| O | 3.191913  | 1.662600  | 12.914807 |
| H | 3.191911  | 2.428343  | 13.515638 |
| H | 4.304636  | 1.502898  | 12.819210 |
| O | 5.988401  | 12.901939 | 4.207874  |
| H | 5.852409  | 12.472088 | 3.338287  |
| H | 5.114140  | 13.014837 | 4.627586  |
| O | 3.416808  | 9.678453  | 1.758075  |
| H | 3.519938  | 8.804147  | 1.318326  |
| H | 3.234285  | 9.752371  | 3.501006  |
| O | 3.650465  | 1.823495  | 6.530085  |
| H | 4.633223  | 1.649881  | 6.528234  |
| H | 3.579216  | 2.663052  | 7.078559  |
| O | 10.991426 | 9.435291  | 8.541409  |
| H | 10.302110 | 9.597089  | 9.235606  |
| H | 11.138089 | 8.451505  | 8.350898  |
| O | 3.662198  | 12.200349 | 11.056360 |
| H | 4.405170  | 11.616640 | 10.667486 |
| H | 3.422035  | 12.801785 | 10.347300 |
| O | 2.323884  | 11.572591 | 0.396734  |
| H | 2.826215  | 10.342841 | 1.171566  |
| H | 2.783895  | 11.797350 | -0.430060 |
| O | 11.086710 | 12.944433 | 9.897257  |
| H | 11.102164 | 12.625845 | 8.957537  |
| H | 11.130258 | 12.162741 | 10.490171 |
| O | 8.115506  | 10.487190 | 3.276587  |
| H | 7.231500  | 10.028698 | 3.326102  |
| H | 8.302737  | 10.951592 | 4.129316  |
| O | 5.860290  | 8.471178  | 0.589910  |
| H | 6.477704  | 9.222869  | 0.625578  |
| H | 5.276190  | 8.578064  | -0.192504 |
| O | 4.138031  | 5.365257  | 11.739085 |
| H | 5.150601  | 5.351523  | 11.884815 |
| H | 4.011102  | 5.652783  | 10.809882 |
| O | 7.985861  | 0.986660  | 11.054819 |
| H | 8.376000  | 0.131301  | 10.926792 |
| H | 8.539503  | 1.688649  | 10.642510 |
| O | 3.018234  | 7.096655  | 0.743694  |
| H | 3.563628  | 6.702924  | 0.014992  |
| H | 3.120881  | 6.403535  | 1.475402  |
| O | 8.992762  | 7.920679  | 0.389080  |
| H | 9.579092  | 8.522217  | 0.958306  |
| H | 8.445730  | 7.474398  | 1.111896  |
| O | 3.975399  | 2.142374  | 10.325369 |
| H | 3.857405  | 3.055978  | 9.848350  |
| H | 3.647168  | 2.176110  | 11.312949 |
| O | 3.692770  | 2.918682  | 3.989937  |
| H | 3.707637  | 2.459240  | 4.846477  |
| H | 4.427780  | 2.551426  | 3.467799  |
| O | 3.969370  | 6.547176  | 9.249332  |
| H | 3.875604  | 7.491505  | 9.610918  |
| H | 4.923296  | 6.492752  | 9.026237  |
| O | 11.151983 | 6.841617  | 8.101723  |
| H | 11.465461 | 6.076881  | 8.670675  |
| H | 10.183317 | 6.959433  | 8.325113  |
| O | 3.267934  | 0.251437  | 2.479259  |
| H | 3.469419  | 1.174743  | 2.391759  |
| H | 4.059345  | -0.316670 | 2.165128  |
| O | 8.111323  | 11.726496 | 8.306863  |
| H | 9.082364  | 11.683496 | 8.030562  |
| H | 8.074693  | 12.707514 | 8.293646  |
| O | 8.693889  | 7.526555  | 8.778485  |
| H | 9.219491  | 7.844552  | 9.580883  |

|   |           |           |           |
|---|-----------|-----------|-----------|
| H | 8.163457  | 8.292822  | 8.490111  |
| O | 5.424429  | 10.506447 | 6.162764  |
| H | 5.787641  | 11.295341 | 5.690533  |
| H | 4.694456  | 10.930717 | 6.680227  |
| O | 6.166491  | 1.418694  | 6.774884  |
| H | 6.404363  | 1.143599  | 7.704788  |
| H | 6.835497  | 1.986150  | 6.301281  |
| O | 5.952466  | 8.826712  | 3.330177  |
| H | 5.281934  | 9.335298  | 3.912863  |
| H | 5.538922  | 8.878300  | 2.456667  |
| O | 8.236210  | 3.035979  | 0.480203  |
| H | 7.884389  | 2.808025  | 1.338816  |
| H | 8.354776  | 4.050630  | 0.572938  |
| O | 8.706095  | 1.661384  | 8.202447  |
| H | 9.130429  | 1.805014  | 9.100825  |
| H | 9.510016  | 1.667252  | 7.620523  |
| O | 7.848607  | 7.120775  | 2.844564  |
| H | 7.310173  | 6.286022  | 2.752607  |
| H | 7.151304  | 7.771294  | 3.156344  |
| O | 4.057541  | 8.732594  | 11.387761 |
| H | 3.319571  | 9.328631  | 11.641226 |
| H | 4.655971  | 9.354863  | 10.833034 |
| O | 6.835819  | 9.251141  | 8.334820  |
| H | 6.956151  | 10.068217 | 7.813367  |
| H | 5.841970  | 9.051936  | 8.350775  |
| O | 5.600779  | 0.470934  | 12.541497 |
| H | 6.400403  | 0.223457  | 12.017491 |
| H | 4.724747  | 0.343262  | 12.028705 |
| O | 3.626088  | 9.684929  | 4.373911  |
| H | 2.153409  | 10.382459 | 0.877483  |
| H | 3.504357  | 10.556325 | 4.809592  |
| O | 3.519336  | 3.923479  | 1.202995  |
| H | 3.342250  | 4.437770  | 2.018883  |
| H | 3.705929  | 4.503144  | 0.377193  |
| O | 10.071483 | 5.079258  | 0.620781  |
| H | 10.278063 | 4.242037  | 0.971132  |
| H | 10.091964 | 5.744727  | 1.413649  |
| O | 10.081756 | 9.166545  | 2.151982  |
| H | 9.374416  | 9.579218  | 2.642653  |
| H | 10.603825 | 9.888906  | 1.776797  |
| O | 6.360941  | 3.438975  | 11.367216 |
| H | 7.014350  | 3.335550  | 12.077885 |
| H | 5.595289  | 2.811101  | 11.344168 |
| O | 3.543402  | 12.340779 | 5.118610  |
| H | 3.101452  | 12.935148 | 5.752086  |
| H | 3.184027  | 12.738461 | 4.243097  |
| O | 11.119641 | 3.656857  | 8.568848  |
| H | 10.527477 | 3.102559  | 9.198110  |
| H | 11.447110 | 3.006655  | 7.888286  |
| O | 8.231526  | 0.174907  | 1.453484  |
| H | 8.187306  | 0.421990  | 0.510026  |
| H | 8.085561  | 0.926131  | 2.034170  |
| O | 10.689381 | 1.835545  | 6.498428  |
| H | 10.610376 | 1.171898  | 5.792626  |
| H | 10.469232 | 2.793992  | 6.108580  |
| O | 10.460902 | 7.584771  | 10.858984 |
| H | 9.854880  | 7.529925  | 11.627604 |
| H | 10.787142 | 6.644705  | 10.854403 |
| O | 7.964292  | 11.885375 | 5.661053  |
| H | 7.289601  | 12.445894 | 5.187976  |
| H | 7.736375  | 11.987056 | 6.627651  |
| O | 10.733572 | 11.851904 | 2.130014  |
| H | 9.914248  | 12.228116 | 1.880153  |
| H | 11.387501 | 12.186364 | 1.496648  |
| O | 3.956469  | 11.810072 | 7.914109  |
| H | 4.787072  | 12.419822 | 8.110357  |

|   |          |           |           |
|---|----------|-----------|-----------|
| H | 3.113430 | 12.304714 | 7.928323  |
| O | 6.155239 | 5.069290  | 2.905355  |
| H | 6.199959 | 5.114939  | 1.903559  |
| H | 6.540957 | 4.231854  | 3.142246  |
| O | 6.492074 | 5.858118  | 0.223028  |
| H | 7.192448 | 5.945185  | -0.418825 |
| H | 6.212898 | 6.797228  | 0.430303  |
| O | 5.354506 | 11.481859 | 1.859102  |
| H | 4.745312 | 10.713911 | 1.583958  |
| H | 5.671007 | 12.070744 | 1.115976  |
| O | 6.577593 | 6.163820  | 8.799687  |
| H | 7.483995 | 6.539760  | 8.545852  |
| H | 6.560746 | 5.291751  | 8.417702  |
| O | 7.550302 | 10.463799 | 0.236409  |
| H | 8.215593 | 9.702062  | 0.192101  |
| H | 7.842514 | 11.005569 | 1.022850  |

&END COORD

```

&KIND H
  BASIS_SET DZVP-MOLOPT-SR-GTH-q1
  POTENTIAL GTH-PBE-q1
&END KIND
&KIND C
  BASIS_SET DZVP-MOLOPT-SR-GTH-q4
  POTENTIAL GTH-PBE-q4
&END KIND
&KIND N
  BASIS_SET DZVP-MOLOPT-SR-GTH-q5
  POTENTIAL GTH-PBE-q5
&END KIND
&KIND O
  BASIS_SET DZVP-MOLOPT-SR-GTH-q6
  POTENTIAL GTH-PBE-q6
&END KIND
&KIND Co
  BASIS_SET DZVP-MOLOPT-SR-GTH-q17
  POTENTIAL GTH-PBE-q17
&END KIND
&END SUBSYS
&END FORCE_EVAL

```

```

&GLOBAL
  PROJECT co-graphene-oh-oxo-nve
  RUN_TYPE MD
  PRINT_LEVEL LOW
&END GLOBAL

```

```

&MOTION
&CONSTRAINT
&FIXED_ATOMS
  COMPONENTS_TO_FIX XYZ
  LIST 1 2 3 4 5 6 7 8 9 10 11 12 13 14 15 16 17 18 19 20 21 22 23 24 25 26 27 28 29 30 31 32 33 34 35 36 37 38 39 40 41 42 43 44 45 46 47 48 49
  50 51 52 53 54 55 56 57 58 59 60 61 62 63 64 65 66 67 68 69 70 71 72 73 74 75 76 77 78 79 80 81 82 83 84
&END FIXED_ATOMS
&END CONSTRAINT
&MD
  ENSEMBLE NVE
  STEPS 10000
  TIMESTEP 0.5
  TEMPERATURE 300
  TEMP_TOL 05
&END MD

```

```

&PRINT
  &TRAJECTORY SILENT
  COMMON_ITERATION_LEVELS      3

```

```
&END TRAJECTORY
&CELL SILENT
  COMMON_ITERATION_LEVELS      3
&END CELL
&VELOCITIES SILENT
  COMMON_ITERATION_LEVELS      3
&END VELOCITIES
&RESTART SILENT
  COMMON_ITERATION_LEVELS      3
&END RESTART
&END PRINT
&END MOTION
```
