# Supplementary material for: Surface-chemistry-driven water dissociation on cobalt-based graphene hybrid from molecular dynamics simulations
Source: Royal Society of Chemistry journal article supplement (doi:10.1039/d2cp03184a), 2022-01-01
Supplement: d2cp03184a2.pdf [file d2cp03184a2.pdf]

## Supporting Information for

# Surface-chemistry-driven water dissociation on cobalt-based graphene hybrid from molecular dynamics simulations

Koteswara Rao Gorantla and Bhabani S. Mallik\*

Department of Chemistry, Indian Institute of Technology Hyderabad, Sangareddy - 502285, Telangana, India

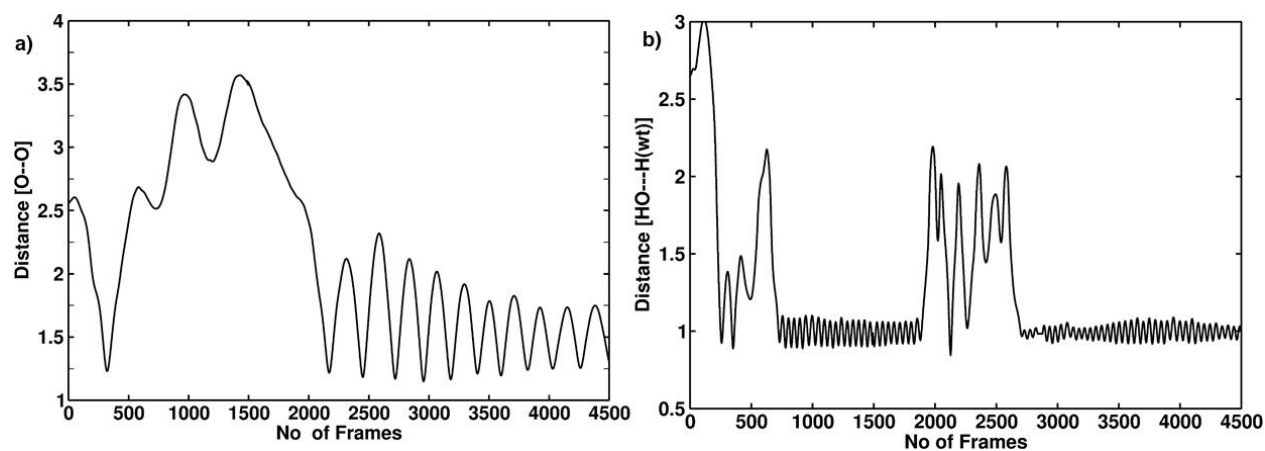

**Figure S1.** Variation of the bond distances (in Å) (a) along the CV1 (b) along the CV2.

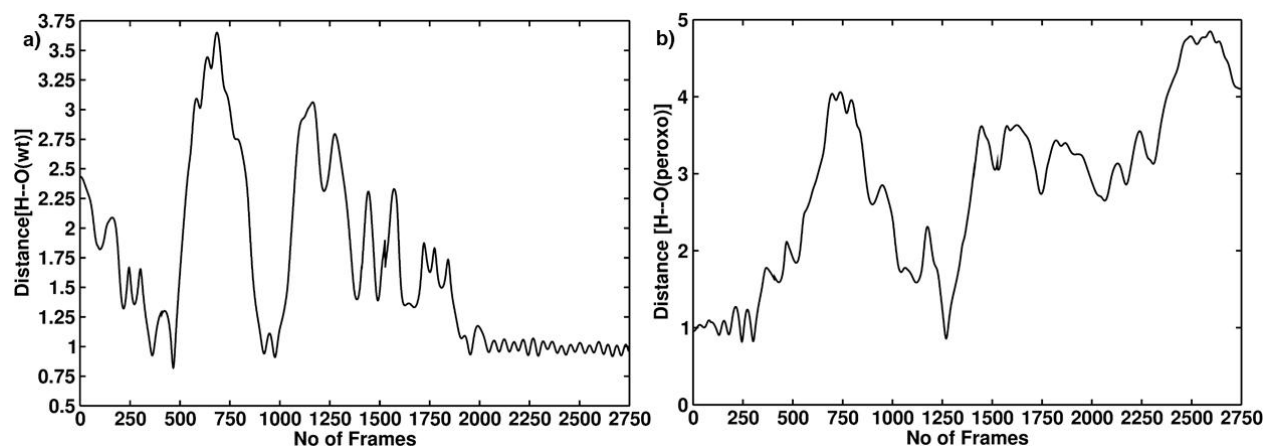

**Figure S2.** Variation of the bond distances (in Å) (a) along the CV1 (b) along the CV2.

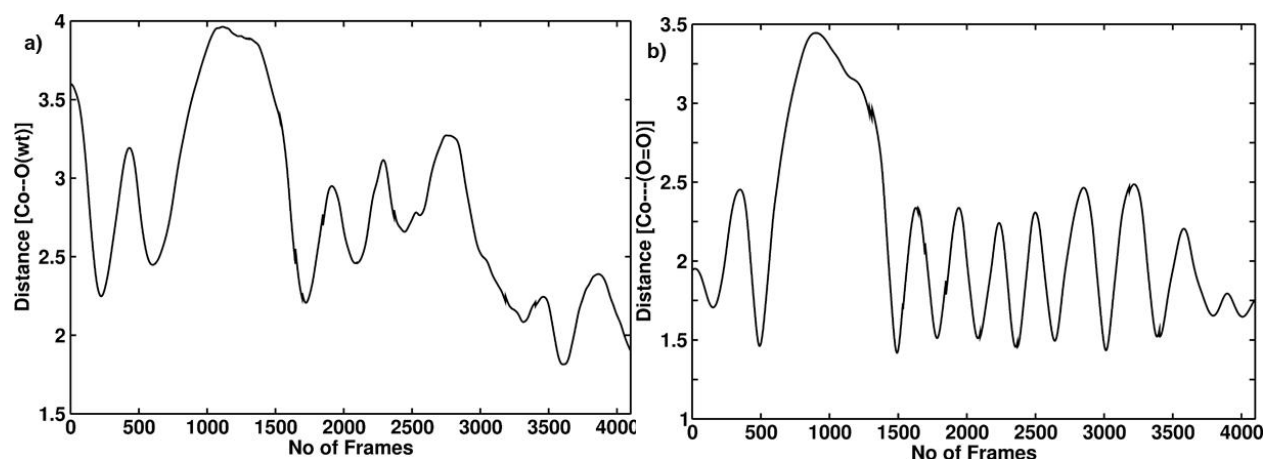

**Figure S3.** Variation of the bond distances (in Å) (a) along the CV1 (b) along the CV2

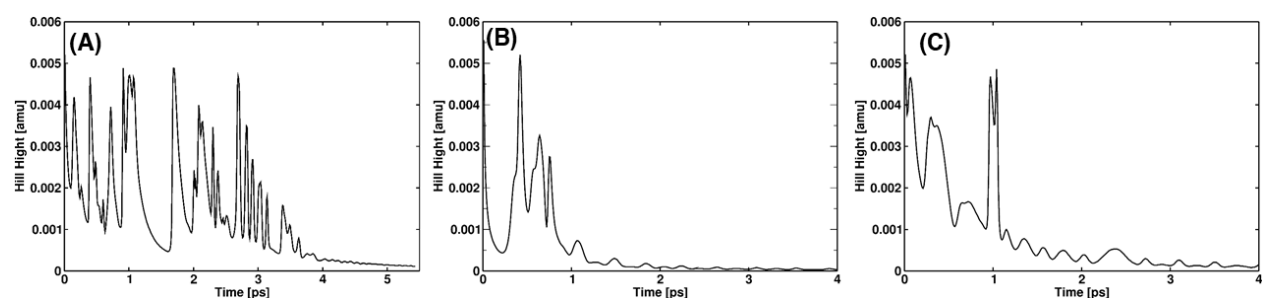

**Figure S4.** Variation of the hill height (in amu) for (A) step1 (B) step2 and (C) step3. All these are run through the Well-Tempered metadynamics, the constant hill size near to zero after formation product gives the evidence for the better convergence of metadynamics simulation.

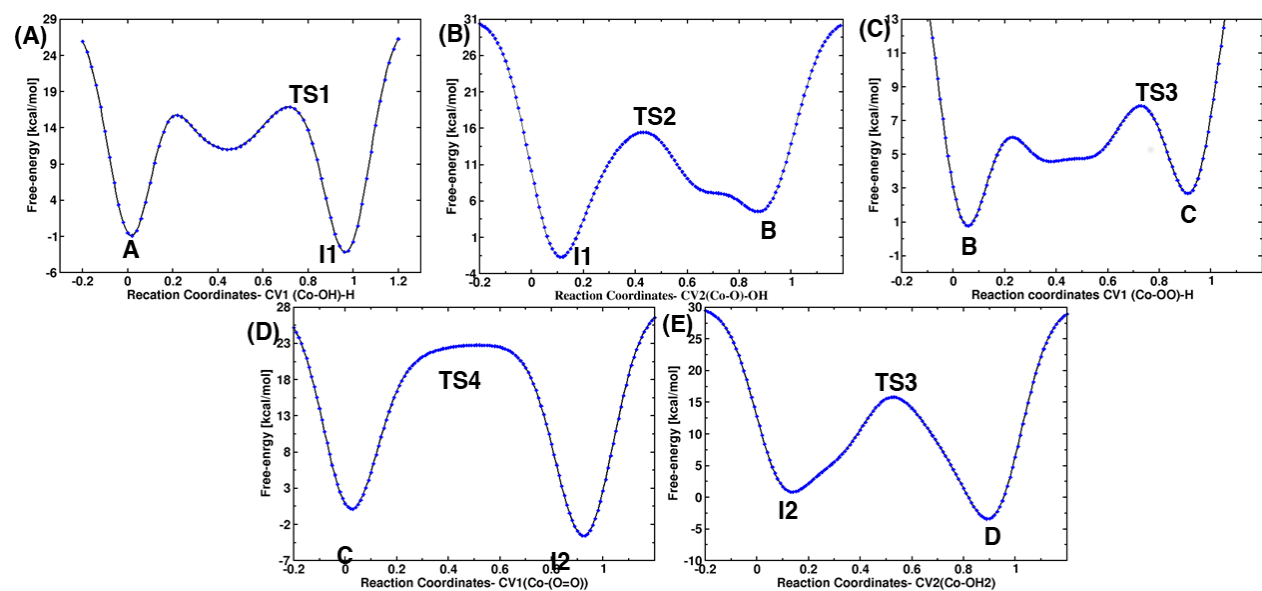

**Figure S5.** 1-D representation of the free-energies along the (A) CV1 of step1 (b) CV2 of step2 (C) CV1 of step 2 (CV1 and CV2 defined for same event) (D) CV1 of step3 (E) CV2 of step3

**Table S1.** Parameters for oxygen-oxygen bond formation.

|                              | CV1 (Co-O <sub>b</sub> -O <sub>c</sub> H bond) | CV2 (Co-O <sub>a</sub> -H bond) |
|------------------------------|------------------------------------------------|---------------------------------|
| NN                           | 8                                              | 6                               |
| ND                           | 24                                             | 18                              |
| R <sub>0</sub>               | 2.10                                           | 2.10                            |
| K (for Quadratic wall)       | 5 (wall at 2.80 Å)                             | 5(wall at 3.00 Å)               |
| Time Step                    | 0.2                                            | -                               |
| Height of Gaussian           | 5.0 x e <sup>-3</sup>                          | -                               |
| Bias factor for WT mtd       | 25                                             |                                 |
| Scale                        | 0.1                                            | 0.1                             |
| HILLS added                  | For 5 steps                                    | For 5steps                      |
| Temperature (avg. in kelvin) | 299.3                                          | -                               |

**Table S2.** Changing of spin moments and charges (Mulliken and Lowdin) during the formation of the oxygen-oxygen bond.

|                        |          | A       |          | TS1     |          | I1      |          | TS2     |          | B       |          |
|------------------------|----------|---------|----------|---------|----------|---------|----------|---------|----------|---------|----------|
|                        |          | Charge  | Spi. mom |
| <b>Co</b>              | Mulliken | 0.4684  | -0.0148  | 0.5285  | -0.3599  | 0.4069  | -0.1154  | 0.5078  | -0.1837  | 0.3895  | -0.0011  |
|                        | Lowdin   | 0.3053  | -0.4337  | 0.4636  | -0.3736  | 0.3420  | -0.1423  | 0.3811  | -0.1828  | 0.3542  | -0.0012  |
| <b>O<sub>a</sub></b>   | Mulliken | -0.4761 | 0.0016   | -0.4927 | -0.0469  | -0.2353 | 0.0006   | -0.3847 | -0.0047  | -0.2909 | 0.0000   |
|                        | Lowdin   | -0.2060 | -0.0001  | -0.2083 | -0.0475  | 0.0008  | 0.0015   | -0.1461 | -0.0064  | -0.0579 | 0.0000   |
| <b>O<sub>b</sub></b>   | Mulliken | -0.4007 | -0.6302  | -0.2153 | -0.3720  | -0.2982 | -1.0424  | -0.3716 | 0.7243   | -0.3274 | 0.0002   |
|                        | Lowdin   | -0.1844 | -0.5923  | 0.0068  | -0.3517  | -0.1455 | -1.0095  | -0.2097 | 0.6972   | -0.1787 | 0.0002   |
| <b>O<sub>c</sub></b>   | Mulliken | -0.3852 | -0.0030  | -0.3026 | -0.4614  | -0.3580 | -0.5462  | -0.3147 | 0.7243   | -0.1906 | 0.0000   |
|                        | Lowdin   | -0.1223 | -0.0030  | -0.0366 | -0.4398  | -0.1153 | -0.5277  | -0.0618 | 0.2783   | -0.0353 | 0.0000   |
| <b>H</b>               | Mulliken | 0.1423  | 0.0000   | 0.1153  | -0.0000  | 0.1341  | 0.0000   | -0.3147 | 0.2788   | 0.1258  | 0.0000   |
|                        | Lowdin   | 0.0265  | 0.0000   | -0.0000 | 0.0000   | 0.0603  | 0.0000   | 0.0342  | 0.0000   | 0.0390  | 0.0000   |
| <b>N (bridged)</b>     | Mulliken | -0.2214 | -0.0148  | -0.2317 | -0.1994  | -0.2713 | -0.0369  | -0.0888 | -0.3553  | -0.1951 | 0.0072   |
|                        | Lowdin   | 0.1569  | -0.0129  | 0.1601  | -0.1726  | 0.1258  | -0.0324  | 0.2376  | -0.3018  | 0.1531  | 0.0083   |
| <b>C (grap)</b>        | Mulliken | 0.0482  | -0.0081  | 0.0316  | -0.0173  | 0.0588  | -0.0044  | 0.0321  | 0.0622   | 0.0409  | 0.0673   |
|                        | Lowdin   | 0.0545  | -0.0074  | 0.0399  | -0.0137  | 0.0672  | -0.0047  | 0.0328  | 0.0446   | 0.0536  | 0.0486   |
| <b>C(grap) grafted</b> | Mulliken | -0.1376 | 0.0002   | -0.1202 | 0.0099   | -0.1020 | 0.0026   | -0.1380 | 0.0072   | -0.1244 | -0.0053  |
|                        | Lowdin   | -0.1730 | 0.0001   | -0.1681 | -0.0025  | -0.1496 | -0.0001  | -0.1892 | -0.0061  | -0.1806 | 0.0037   |
| <b>C(grap)</b>         | Mulliken | 0.0599  | 0.0113   | 0.0487  | -0.0510  | 0.0492  | -0.0256  | 0.0534  | 0.0121   | 0.0434  | 0.0375   |
|                        | Lowdin   | 0.0660  | 0.0071   | 0.0613  | -0.0439  | 0.0706  | -0.0219  | 0.0885  | 0.0012   | 0.0354  | 0.0248   |
| <b>C(grap)</b>         | Mulliken | 0.0513  | 0.0060   | 0.0158  | 0.0123   | 0.0399  | 0.0096   | 0.0355  | 0.0130   | 0.0347  | 0.0187   |
|                        | Lowdin   | 0.0309  | 0.0032   | 0.0214  | 0.0051   | 0.0263  | 0.0054   | 0.0109  | 0.0040   | 0.0627  | 0.0123   |

**Table S3.** Parameters for the formation of superoxide complex from peroxide complex.

|                              | CV1 (Co-(O <sub>b</sub> -Oc)-H to O <sub>d</sub> H <sub>2</sub> bond) | CV2 (Co-(O <sub>b</sub> -O <sub>c</sub> ) to H bond) |
|------------------------------|-----------------------------------------------------------------------|------------------------------------------------------|
| NN                           | 6                                                                     | 6                                                    |
| ND                           | 18                                                                    | 18                                                   |
| R <sub>0</sub>               | 2.00                                                                  | 2.10                                                 |
| Time Step                    | 0.2                                                                   | -                                                    |
| Height of Gaussian           | 5.0 x e <sup>-3</sup>                                                 | -                                                    |
| Bias factor for WT mtd       | 25                                                                    |                                                      |
| Scale                        | 0.1                                                                   | 0.1                                                  |
| HILLS added                  | For 5 steps                                                           | For 5steps                                           |
| Temperature (avg. in kelvin) | 300.5                                                                 | -                                                    |

**Table S4.** Changing of Mulliken and Lowdin moments and charges during the formation of superoxide complex from peroxide complex.

|                        |          | B       |          | TS3     |          | C       |          |
|------------------------|----------|---------|----------|---------|----------|---------|----------|
|                        |          | Charge  | Spi. mom | Charge  | Spi. mom | Charge  | Spi. mom |
| <b>Co</b>              | Mulliken | 0.4229  | 0.0883   | 0.4447  | 0.2273   | 0.4009  | 0.2051   |
|                        | Lowdin   | 0.3411  | 0.0910   | 0.3605  | 0.2342   | 0.3137  | 0.2139   |
| <b>O<sub>a</sub></b>   | Mulliken | -0.3171 | 0.0494   | -0.2203 | 0.1186   | -0.2697 | 0.2079   |
|                        | Lowdin   | -0.1495 | 0.0470   | -0.0758 | 0.1117   | -0.1003 | 0.2013   |
| <b>O<sub>b</sub></b>   | Mulliken | -0.1328 | 0.0016   | -0.2090 | 0.0313   | -0.3763 | 0.1959   |
|                        | Lowdin   | 0.0114  | 0.0025   | -0.0980 | 0.0351   | -0.2248 | 0.1946   |
| <b>O<sub>c</sub></b>   | Mulliken | -0.2382 | 0.0021   | -0.1128 | 0.0050   | -0.0400 | 0.0047   |
|                        | Lowdin   | -0.0289 | 0.0026   | 0.0633  | 0.0048   | 0.1439  | 0.0040   |
| <b>H</b>               | Mulliken | 0.1317  | 0.0006   | 0.1646  | 0.0070   | 0.1524  | 0.0028   |
|                        | Lowdin   | -0.0512 | 0.0005   | 0.0583  | 0.0056   | -0.0086 | 0.0039   |
| <b>N (bridged)</b>     | Mulliken | -0.0915 | 0.4542   | -0.0801 | 0.4559   | -0.1242 | 0.3229   |
|                        | Lowdin   | 0.2319  | 0.3992   | 0.2406  | 0.4002   | 0.1970  | 0.2858   |
| <b>C (grap)</b>        | Mulliken | 0.0448  | -0.0183  | 0.0375  | 0.1218   | 0.0425  | 0.1155   |
|                        | Lowdin   | 0.0376  | -0.0131  | 0.0430  | 0.0542   | 0.0484  | 0.0847   |
| <b>C(grap) grafted</b> | Mulliken | -0.1367 | -0.0174  | -0.1471 | -0.0255  | -0.1174 | -0.0254  |
|                        | Lowdin   | -0.1929 | 0.0026   | -0.1911 | 0.01843  | -0.1622 | 0.0133   |
| <b>C(grap)</b>         | Mulliken | 0.0324  | -0.0174  | 0.0317  | 0.0760   | 0.0191  | 0.1173   |
|                        | Lowdin   | 0.0326  | -0.0131  | 0.0430  | 0.0542   | 0.0484  | 0.0847   |
| <b>C(grap)</b>         | Mulliken | 0.0317  | 0.0446   | 0.0380  | 0.1023   | 0.0402  | 0.1067   |
|                        | Lowdin   | 0.0362  | 0.0395   | 0.0254  | 0.0789   | 0.0383  | 0.0801   |

**Table S5.** Parameters for addition of water molecule with release of dioxygen.

|                              | CV1 (Co- O <sub>e</sub> H <sub>2</sub> bond) | CV2 (Co-O <sub>a</sub> -H bond) |
|------------------------------|----------------------------------------------|---------------------------------|
| NN                           | 10                                           | 6                               |
| ND                           | 30                                           | 18                              |
| R <sub>0</sub>               | 3.20                                         | 2.10                            |
| K (for Quadratic wall)       | 5 (wall at 4.00 Å)                           | 5(wall at 3.00 Å)               |
| Time Step                    | 0.2                                          | -                               |
| Height of Gaussian           | 5.0 x e <sup>-3</sup>                        | -                               |
| Bias factor for WT mtd       | 25                                           |                                 |
| Scale                        | 0.1                                          | 0.1                             |
| HILLS added                  | For 5 steps                                  | For 5steps                      |
| Temperature (avg. in kelvin) | 304.6                                        | -                               |

**Table S6.** Changing of Mulliken and Lowdin spin moments and charges during the release of the oxygen molecule.

|                        |          | C       |          | TS4     |          | I2      |          | TS5     |          | D       |          |
|------------------------|----------|---------|----------|---------|----------|---------|----------|---------|----------|---------|----------|
|                        |          | Charge  | Spi. mom |
| <b>Co</b>              | Mulliken | 0.4129  | 0.0002   | 0.3310  | -0.0001  | 0.3661  | -0.0003  | 0.6230  | 0.1190   | 0.5621  | 0.2130   |
|                        | Lowdin   | 0.2767  | 0.0002   | 0.2861  | -0.0001  | 0.3215  | -0.0004  | 0.5451  | 0.1141   | 0.5203  | 0.2030   |
| <b>O<sub>b</sub></b>   | Mulliken | -0.3112 | 0.00005  | -0.1891 | 0.00002  | -0.2266 | 0.00001  | -0.0009 | 0.0087   | -0.3663 | -0.1668  |
|                        | Lowdin   | -0.1170 | 0.0001   | -0.0047 | 0.00007  | -0.0159 | 0.00005  | -0.1966 | -0.0901  | -0.2001 | -0.1588  |
| <b>O<sub>c</sub></b>   | Mulliken | -0.2516 | 0.00006  | -0.2518 | 0.00001  | -0.1953 | 0.00002  | -0.1143 | -0.0177  | -0.2369 | -0.0348  |
|                        | Lowdin   | -0.0991 | 0.00007  | -0.1144 | 0.00001  | -0.0615 | 0.00003  | 0.0548  | -0.0183  | -0.0691 | -0.0354  |
| <b>O<sub>e</sub></b>   | Mulliken | -0.2843 | -0.00005 | -0.2518 | 0.00001  | -0.2823 | -0.0000  | -0.2264 | 0.0061   | -0.3081 | 0.0040   |
|                        | Lowdin   | -0.0303 | -0.00001 | -0.0315 | -0.0000  | -0.0236 | -0.0000  | 0.0011  | 0.0068   | -0.0765 | 0.0067   |
| <b>N (bridged)</b>     | Mulliken | 0.0199  | 0.0160   | -0.0866 | 0.02609  | -0.0255 | 0.0213   | -0.0009 | 0.0087   | -0.0318 | 0.0284   |
|                        | Lowdin   | 0.2407  | 0.0154   | 0.1823  | 0.0254   | 0.2098  | 0.0212   | 0.2110  | 0.0094   | 0.2035  | 0.0279   |
| <b>C (grap)</b>        | Mulliken | 0.0175  | 0.0161   | 0.0264  | 0.0485   | 0.0224  | 0.0483   | 0.0136  | 0.0250   | 0.0107  | 0.0394   |
|                        | Lowdin   | 0.0335  | 0.0116   | 0.0497  | 0.0352   | 0.0488  | 0.0354   | 0.0237  | 0.0185   | 0.0370  | 0.0288   |
| <b>C(grap) grafted</b> | Mulliken | -0.1326 | -0.0037  | -0.0993 | -0.0084  | -0.1012 | -0.0066  | -0.1304 | -0.0030  | -0.1024 | -0.0072  |
|                        | Lowdin   | -0.1390 | 0.0029   | -0.1267 | 0.0067   | -0.1187 | 0.0066   | -0.1489 | 0.0050   | -0.1094 | 0.0068   |
| <b>C(grap)</b>         | Mulliken | 0.0020  | 0.0606   | -0.0076 | 0.1074   | -0.0218 | 0.0913   | 0.0292  | 0.0791   | 0.0275  | 0.1015   |
|                        | Lowdin   | 0.0164  | 0.0431   | 0.0153  | 0.0776   | -0.0061 | 0.0651   | 0.0536  | 0.0570   | 0.0296  | 0.0726   |
| <b>C(grap)</b>         | Mulliken | 0.0308  | 0.0053   | 0.0264  | 0.0355   | 0.0248  | 0.0346   | 0.0304  | 0.0093   | 0.0323  | 0.03025  |
|                        | Lowdin   | 0.0188  | 0.0047   | 0.0180  | 0.0265   | 0.0283  | 0.0261   | 0.0237  | 0.0075   | 0.0266  | 0.0226   |
